# Supplementary material for: Discovery of drug–omics associations in type 2 diabetes with generative deep-learning models
Source: Springer Nature journal article supplement (doi:10.1038/s41587-022-01520-x), 2023-01-02
Supplement: MOESM1 [file 41587_2022_1520_MOESM1_ESM.pdf › 41587_2022_1520_MOESM1_ESM.pdf]

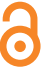

# Discovery of drug–omics associations in type 2 diabetes with generative deep-learning models

In the format provided by the authors and unedited

## Supplementary Information

### Discovery of drug-omics associations in type 2 diabetes with generative deep-learning models

#### Author list

Rosa Lundbye Allesøe<sup>1,2,3</sup>, Agnete Troen Lundgaard<sup>1,2</sup>, Ricardo Hernández Medina<sup>1</sup>, Alejandro Aguayo-Orozco<sup>1,2</sup>, Joachim Johansen<sup>1,2</sup>, Jakob Nybo Nissen<sup>1</sup>, Caroline Brorsson<sup>1,2</sup>, Gianluca Mazzoni<sup>1,2</sup>, Lili Niu<sup>1</sup>, Jorge Hernansanz Biel<sup>1,2</sup>, Valentas Brasas<sup>1</sup>, Henry Webel<sup>1</sup>, Michael Eriksen Benros<sup>3,4</sup>, Anders Gorm Pedersen<sup>2</sup>, Piotr Jaroslaw Chmura<sup>1,2</sup>, Ulrik Plesner Jacobsen<sup>1,2</sup>, Andrea Mari<sup>5</sup>, Robert Koivula<sup>6</sup>, Anubha Mahajan<sup>6</sup>, Ana Vinuela<sup>7,8</sup>, Juan Fernandez Tajés<sup>6</sup>, Sapna Sharma<sup>9,10,11</sup>, Mark Haid<sup>12</sup>, Mun-Gwan Hong<sup>13</sup>, Petra B. Musholt<sup>14</sup>, Federico De Masi<sup>1,2</sup>, Josef Vogt<sup>15</sup>, Helle Krogh Pedersen<sup>2,15</sup>, Valborg Gudmundsdottir<sup>1,2</sup>, Angus Jones<sup>16</sup>, Gwen Kennedy<sup>17</sup>, Jimmy Bell<sup>18</sup>, E. Louise Thomas<sup>18</sup>, Gary Frost<sup>19</sup>, Henrik Thomsen<sup>20</sup>, Elizaveta Hansen<sup>20</sup>, Tue Haldor Hansen<sup>15</sup>, Henrik Vestergaard<sup>15</sup>, Mirthe Muilwijk<sup>21</sup>, Marieke T. Blom<sup>22</sup>, Leen M. 't Hart<sup>21,23,24</sup>, Francois Pattou<sup>25</sup>, Violeta Raverdy<sup>25</sup>, Soren Brage<sup>26</sup>, Tarja Kokkola<sup>27</sup>, Alison Heggie<sup>28</sup>, Donna McEvoy<sup>29</sup>, Miranda Mourby<sup>30</sup>, Jane Kaye<sup>30</sup>, Andrew Hattersley<sup>16</sup>, Timothy McDonald<sup>16</sup>, Martin Ridderstråle<sup>31</sup>, Mark Walker<sup>32</sup>, Ian Forgie<sup>33</sup>, Giuseppe N. Giordano<sup>34</sup>, Imre Pavo<sup>35</sup>, Hartmut Ruetten<sup>14</sup>, Oluf Pedersen<sup>15</sup>, Torben Hansen<sup>15</sup>, Emmanouil Dermitzakis<sup>7</sup>, Paul W. Franks<sup>31,36,37</sup>, Jochen M. Schwenk<sup>13</sup>, Jerzy Adamski<sup>38,39,40</sup>, Mark I. McCarthy<sup>6,41,42</sup>, Ewan Pearson<sup>33</sup>, Karina Banasik<sup>1,2</sup>, Simon Rasmussen<sup>1</sup>, Søren Brunak<sup>1,2</sup>, IMI DIRECT Consortium

#### Affiliations

1 Novo Nordisk Foundation Center for Protein Research, Faculty of Health and Medical Sciences, University of Copenhagen, Copenhagen, Denmark

2 Department of Health Technology, Technical University of Denmark, Kongens Lyngby, Denmark

3 Copenhagen Research Centre for Mental Health, Mental Health Centre Copenhagen, Copenhagen University Hospital, Denmark

4 Department of Immunology and Microbiology, Faculty of Health and Medical Sciences, University of Copenhagen, Copenhagen, Denmark

5 C.N.R. Institute of Neuroscience, Padova, Italy

6 Wellcome Centre for Human Genetics, University of Oxford, Oxford, UK

- 7 Department of Genetic Medicine and Development, University of Geneva Medical School, Geneva, Switzerland
- 8 Biosciences Institute, Faculty of Medical Sciences, Newcastle University, Newcastle, UK.
- 9 Research Unit of Molecular Epidemiology, Helmholtz Zentrum München, German Research Center for Environmental Health, Neuherberg, Bavaria, Germany
- 10 Institute of Epidemiology, Helmholtz Zentrum München, German Research Center for Environmental Health, Neuherberg, Bavaria, Germany
- 11 Chair of Food Chemistry and Molecular and Sensory Science, Technical University of Munich, Freising, Germany
- 12 Metabolomics and Proteomics Core, Helmholtz Zentrum Muenchen, German Research Center for Environmental Health, Neuherberg, Germany
- 13 Affinity Proteomics, Science for Life Laboratory, School of Engineering Sciences in Chemistry, Biotechnology and Health, KTH Royal Institute of Technology, Solna, Sweden
- 14 Research and Development Global Development, Translational Medicine and Clinical Pharmacology, Sanofi-Aventis Deutschland, Frankfurt, Germany
- 15 Novo Nordisk Foundation Center for Basic Metabolic Research, Faculty of Health and Medical Sciences, University of Copenhagen, Copenhagen, Denmark
- 16 University of Exeter Medical School, Exeter, UK
- 17 The Immunoassay Biomarker Core Laboratory, School of Medicine, University of Dundee, Dundee, UK
- 18 Research Centre for Optimal Health, Department of Life Sciences, University of Westminster, London, UK
- 19 Section for Nutrition Research, Faculty of Medicine, Hammersmith Campus, Imperial College London, London, UK
- 20 Department of Radiology, Copenhagen University Hospital Herlev-Gentofte, Herlev, Denmark
- 21 Department of Epidemiology and Data Science, Amsterdam UMC, Vrije Universiteit Amsterdam, Amsterdam, the Netherlands
- 22 Department of General Practice, Amsterdam Public Health Research Institute, Amsterdam UMC, Vrije Universiteit Amsterdam, Amsterdam, the Netherlands
- 23 Department of Biomedical Data Science, Section Molecular Epidemiology, Leiden University Medical Center, Leiden, the Netherlands
- 24 Department of Cell and Chemical Biology, Leiden University Medical Center, Leiden, the Netherlands

- 25 Inserm, Univ Lille, CHU Lille, Lille Pasteur Institute, EGID, Lille, France
- 26 MRC Epidemiology Unit, University of Cambridge School of Clinical Medicine, Cambridge, UK
- 27 Department of Medicine, University of Eastern Finland, Kuopio, Finland
- 28 Institute of Cellular Medicine, Newcastle University, Newcastle, UK
- 29 Diabetes Research Network, Royal Victoria Infirmary, Newcastle, UK
- 30 Centre for Health, Law and Emerging Technologies (HeLEX), Faculty of Law, University of Oxford, Oxford, United Kingdom
- 31 Lund University Diabetes Centre, Department of Clinical Sciences, Lund University, Malmö, Sweden
- 32 Translational and Clinical Research Institute, Faculty of Medical Sciences, Newcastle University, Newcastle, UK
- 33 Division of Population Health & Genomics, School of Medicine, University of Dundee, Dundee, UK
- 34 Genetic and Molecular Epidemiology Unit, Lund University Diabetes Centre, Department of Clinical Sciences, CRC, Lund University, SUS, Malmö, Sweden
- 35 Eli Lilly Regional Operations, Vienna, Austria
- 36 Harvard T.H. Chan School of Public Health, Boston, MA, USA
- 37 OCDEM, Radcliffe Department of Medicine, University of Oxford, Oxford, UK
- 38 Institute of Experimental Genetics, Helmholtz Zentrum München, German Research Center for Environmental Health, Neuherberg, Germany
- 39 Department of Biochemistry, Yong Loo Lin School of Medicine, National University of Singapore, Singapore, Singapore
- 40 Institute of Biochemistry, Faculty of Medicine, University of Ljubljana, Ljubljana, Slovenia
- 41 Oxford Centre for Diabetes, Endocrinology and Metabolism, University of Oxford, Oxford, UK
- 42 Present address: Genentech, South San Francisco, USA

Correspondence: Simon Rasmussen ([simon.rasmussen@cpr.ku.dk](mailto:simon.rasmussen@cpr.ku.dk)) and Søren Brunak ([soren.brunak@cpr.ku.dk](mailto:soren.brunak@cpr.ku.dk))

## Supplementary Notes

### Severity of drug-drug-interactions and clinical data

We investigated if any of the drug combinations had known drug-drug-interactions (DDIs). Of the 55 drug-drug pairs that were administered in our cohort we identified 52 with DDIs registered across 26 DDI databases where 12 had registered DDIs with known clinical implications ranging from 'no effect' to 'moderate effect'. We then studied if there was an association between the severity of the DDIs and the similarity of the drug-drug pairs in the multi-omics and clinical data. Here, we found that the overall omics data had small or negative associations with Spearman's Rho between -0.19 and 0.095 that were not statistically significant. The highest correlation was between reported DDIs and the clinical response with a Spearman's Rho of 0.32 (**Supplementary Figure 21**). This could imply that the severity of the DDIs were best captured in the clinical representation whereas the omics profiles were maybe less affected by the level of severity for the DDIs with known clinical implications.

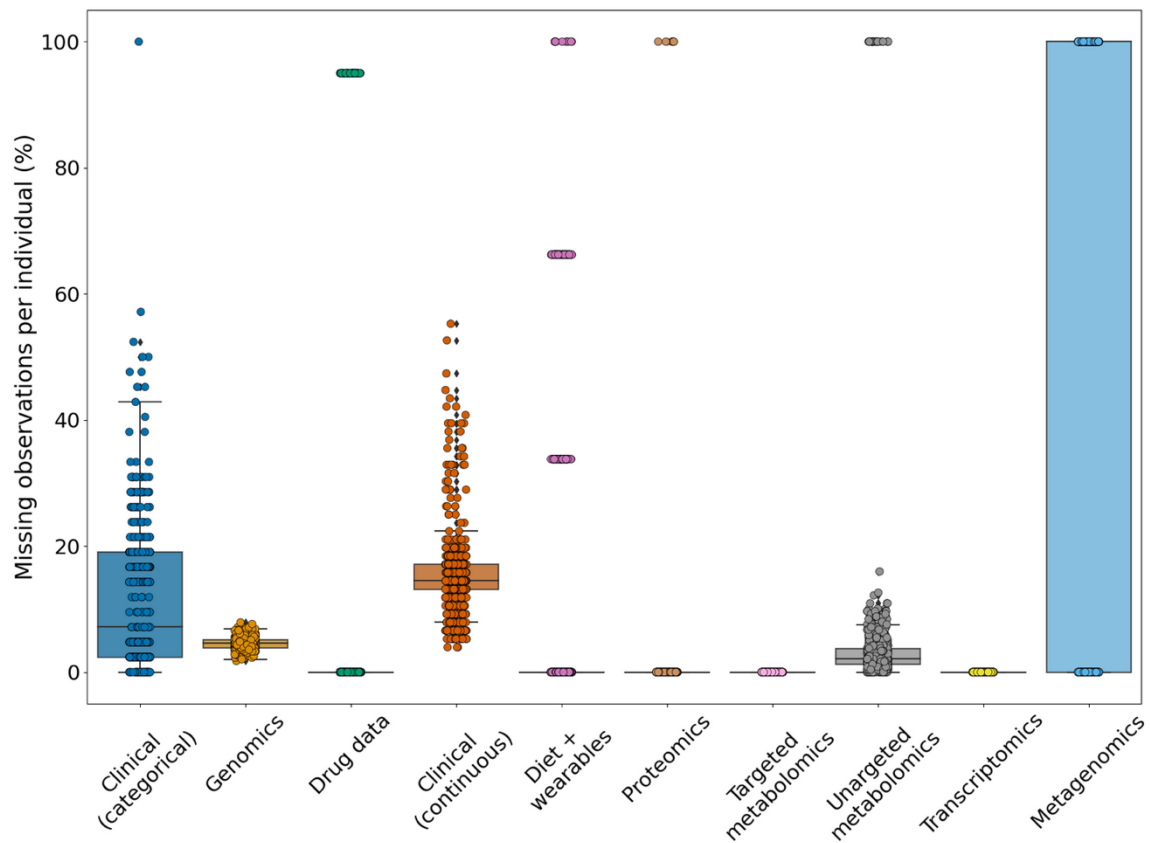

**Supplementary Figure 1. Missing data across datasets.** Per individual missingness (y-axis) for each of the multi-omics and clinical datasets (x-axis). The lower and upper hinges correspond to the first and third quartiles (25th and 75th percentiles). The upper and lower whiskers extend from the hinge to the highest and lowest values, respectively, but no further than  $1.5 \times$  interquartile range (IQR) from the hinge. IQR is the distance between the first and third quartiles. Data beyond the ends of whiskers are outliers and are plotted individually. Each individual datapoint is shown, however overplotting can occur, i.e. there are many more points at 100% missingness for Metagenomics than for Untargeted metabolomics. See Supplementary Table 1 for number of features in each dataset.

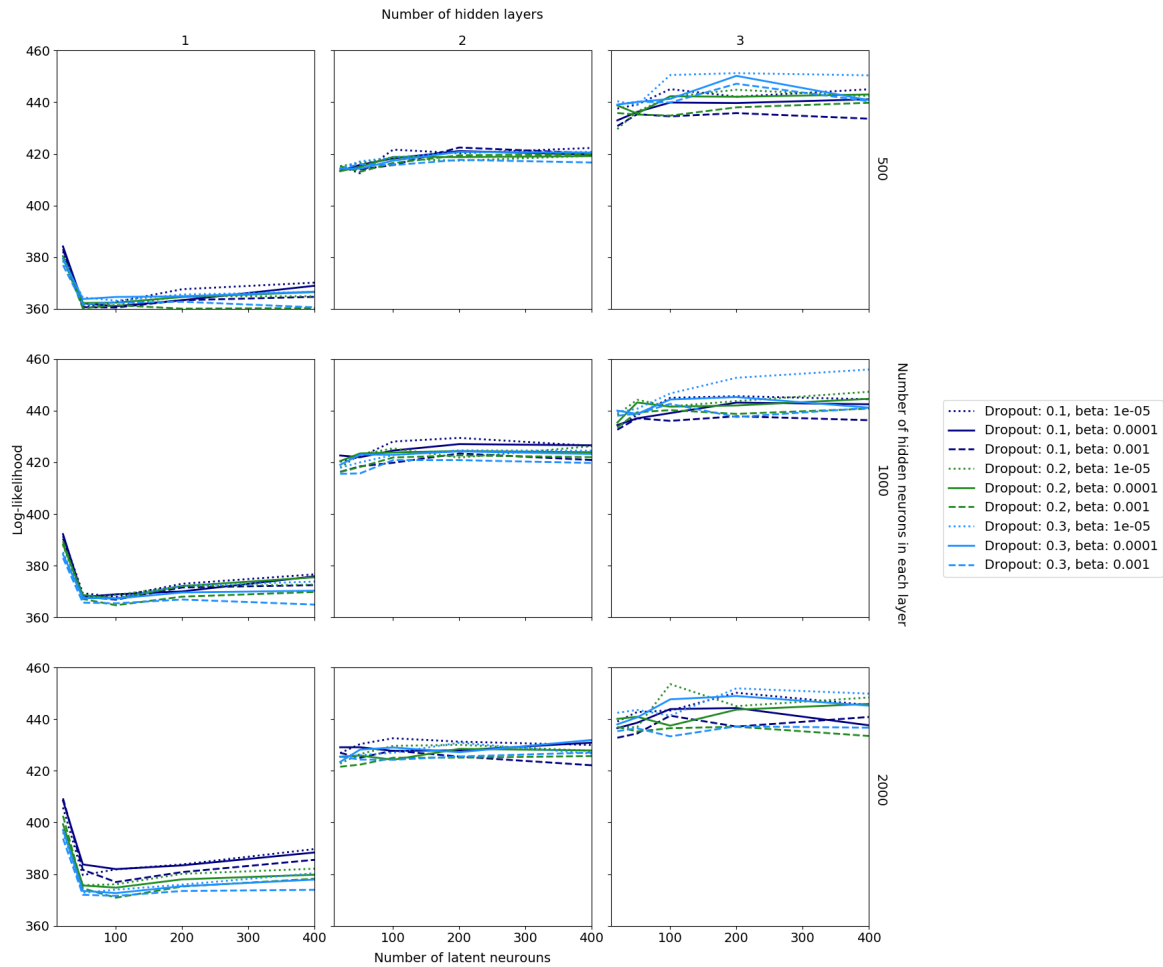

**Supplementary Figure 2. Using a test set for selecting hyperparameters for the VAE.**

When selecting the hyperparameters for the VAE in MOVE we divided the dataset into train (90%) and test (10%) and evaluated the test log-likelihood loss (y-axis) as a function of latent neurons (x-axis), number of hidden layers (boxes from left to right), number of hidden neurons in each layer (boxes from upper to lower), dropout and weight on the Kullback-Leibler divergence (dotted and colored lines indicated in legend).

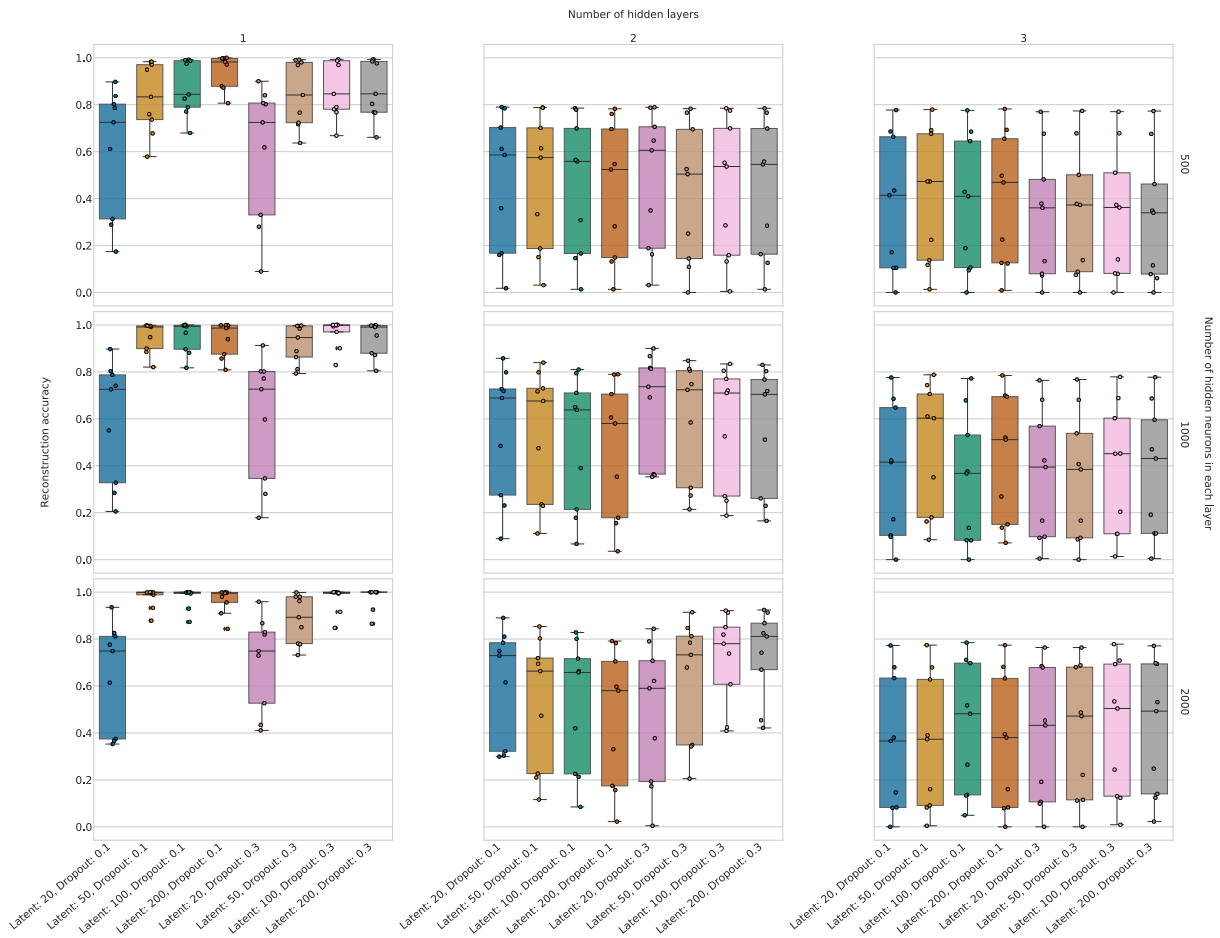

### Supplementary Figure 3. Using the training set reconstruction to select

**hyperparameters for the VAE.** In addition to assessing the test set log-likelihood we assessed the reconstructions of the training set. Here we defined an accurate reconstruction for categorical variables as the class with the highest probability corresponding to the class given by the input. For continuous variables, the accuracy was assessed by comparing the reconstructed array with the input array using cosine similarity for each individual instead of using exact matching. Sample size ( $n$ ) for each of the comparisons were 10, equal to the number of data sets (omics and clinical). The lower and upper hinges correspond to the first and third quartiles (25th and 75th percentiles). The upper and lower whiskers extend from the hinge to the highest and lowest values, respectively, but no further than  $1.5 \times$  interquartile range (IQR) from the hinge. IQR is the distance between the first and third quartiles. Data beyond the ends of whiskers are outliers and are plotted individually.

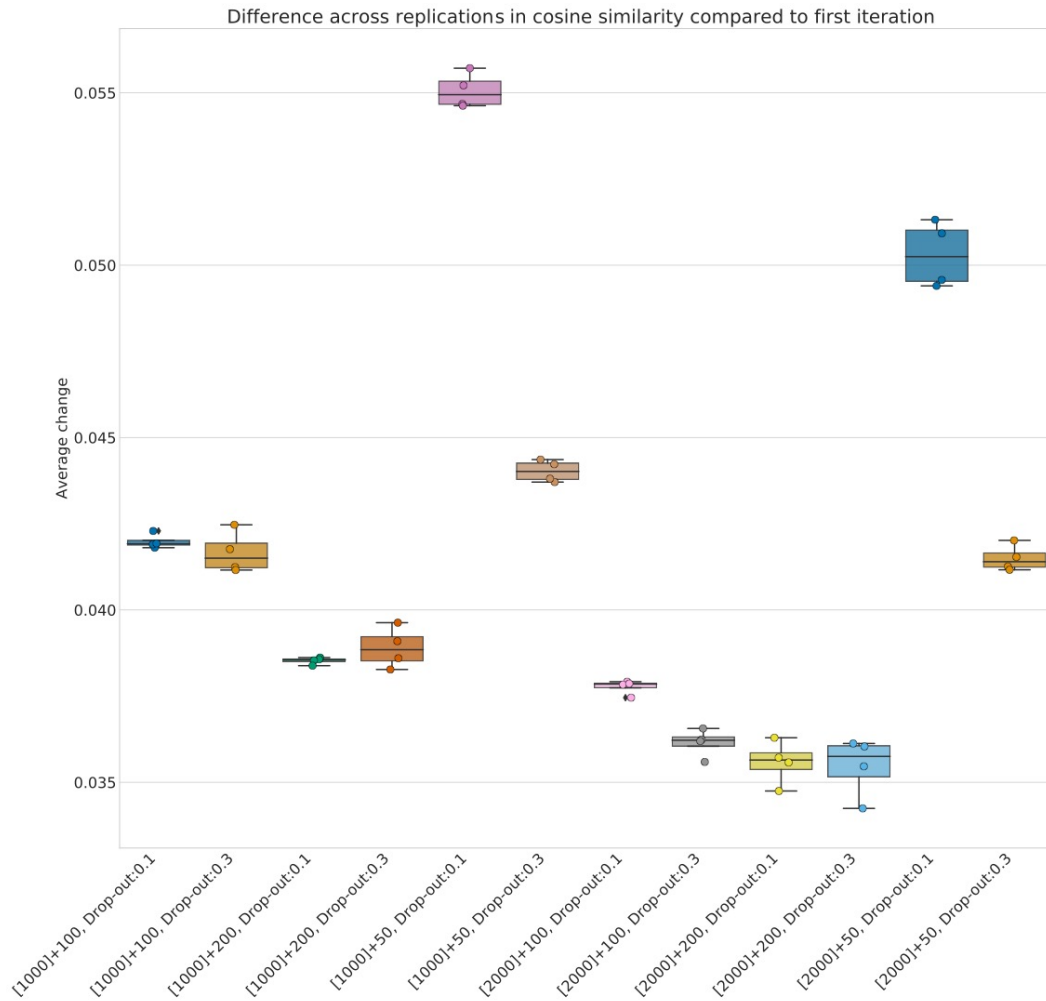

**Supplementary Figure 4. Assessing reconstruction stability for selecting VAE**

**hyperparameters.** Finally, we assessed how stable the reconstructions were between runs with identical hyperparameter settings. The stability of the model was assessed by comparing cosine similarity to the same individuals when run through the first iteration and thus an average change (y-axis) of 0 indicates exactly the same reconstructions as the first iteration. For each hyperparameter combination, we ran 5 replications. The x-axis legend indicates [no. hidden neurons]+no. latent neurons, fraction dropout. The final hyperparameters were: one hidden layer of 2,000 neurons, a latent space of at least 100, and dropout of 0.1. Sample size (n) for each of the comparisons were 10, equal to the number of data sets (omics and clinical). The lower and upper hinges correspond to the first and third quartiles (25th and 75th percentiles). The upper and lower whiskers extend from the hinge to the highest and lowest values, respectively, but no further than  $1.5 \times$  interquartile range (IQR) from the hinge. IQR is the distance between the first and third quartiles. Data beyond the ends of whiskers are outliers and are plotted individually.

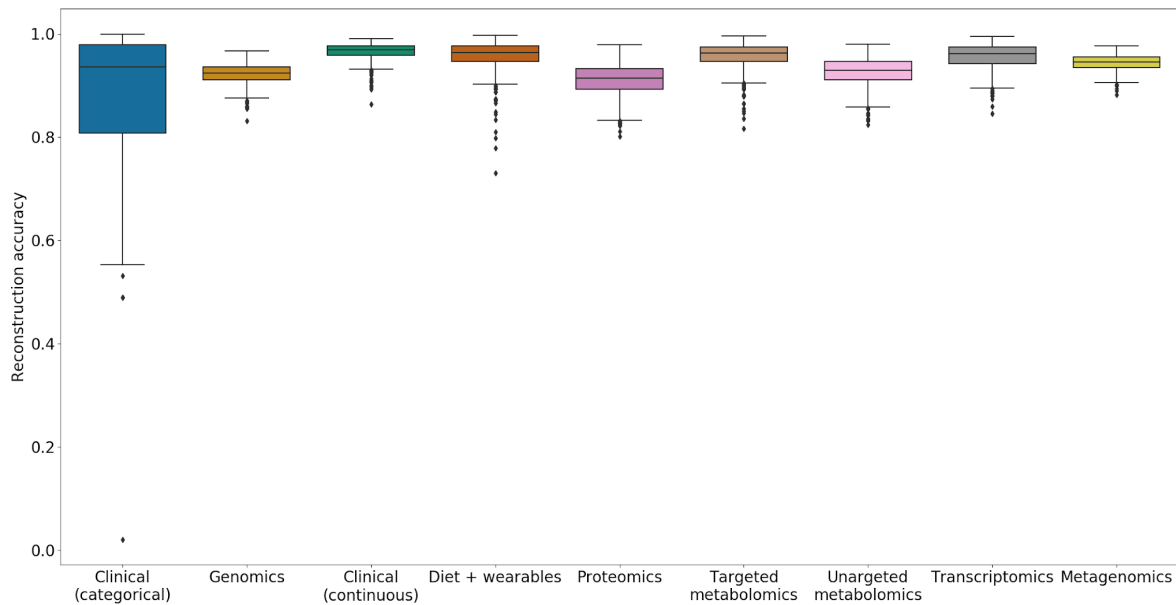

**Supplementary Figure 5. Reconstruction accuracy of the selected model.** Reconstruction accuracy of each dataset when using the selected hyperparameter settings on the entire dataset of the 789 individuals. As noted above, we defined an accurate reconstruction for categorical variables as the class with the highest probability corresponding to the class given by the input. For continuous variables, the accuracy was assessed by comparing the reconstructed array with the input array using cosine similarity for each individual instead of using exact matching. The lower and upper hinges correspond to the first and third quartiles (25th and 75th percentiles). The upper and lower whiskers extend from the hinge to the highest and lowest values, respectively, but no further than  $1.5 \times$  interquartile range (IQR) from the hinge. IQR is the distance between the first and third quartiles. Data beyond the ends of whiskers are outliers and are plotted individually.

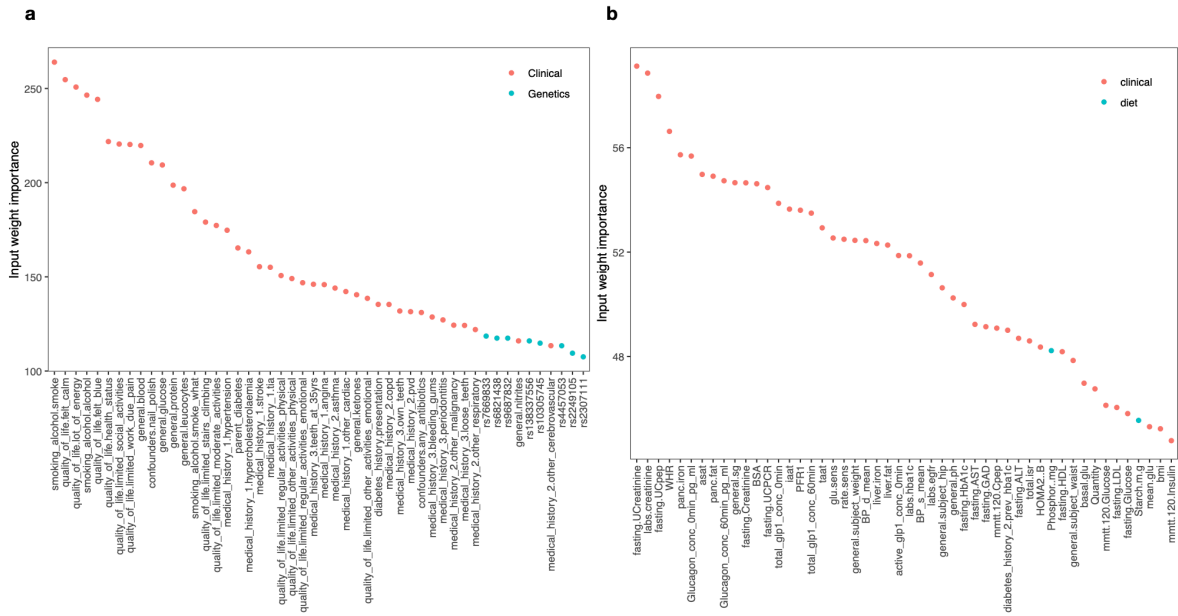

**Supplementary Figure 6. MOVE first layer and latent feature importance.** (a) Summed weight of the individual categorical input features to the first hidden layer in the final trained VAE. Higher values indicate that more weight is attributed to the input feature. Only the top 50 features are shown (Clinical: red, Genetics: blue). (b) As (a), but summed weight of the individual continuous input features (Clinical: red, Diet and wearables: blue). Due to the difference in encoding and number of features between the categorical and continuous features the weights cannot be directly compared between the two but should rather be used as a rank of importance.

**a**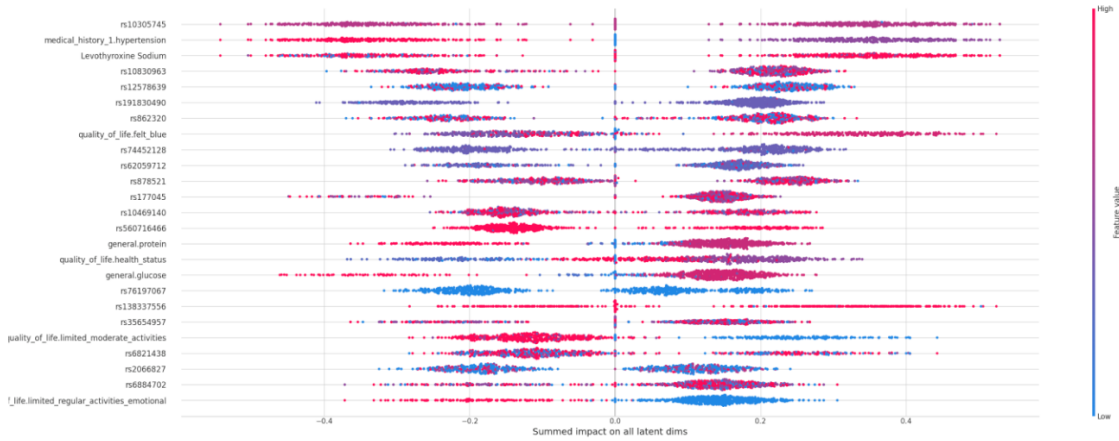**b**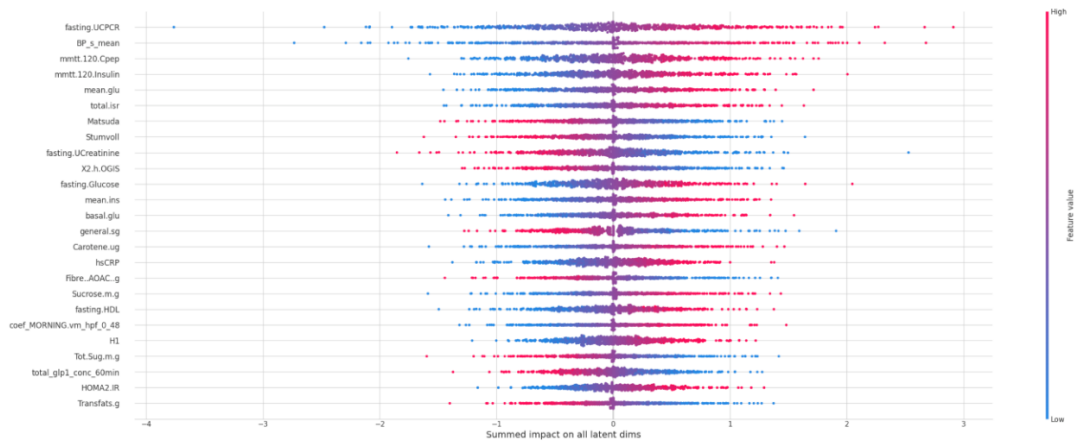

**Supplementary Figure 7. SHAP analysis of the MOVE latent space.** (a) SHapley Additive exPlanations (SHAP) for the discrete (a) and continuous (b) datasets showing their impact on the position of an individual in the latent space of the VAE in MOVE. The feature values are indicated as blue (low value) and red (high values). Note that the scales of the discrete features (a) are on a smaller scale than for the continuous features (b).

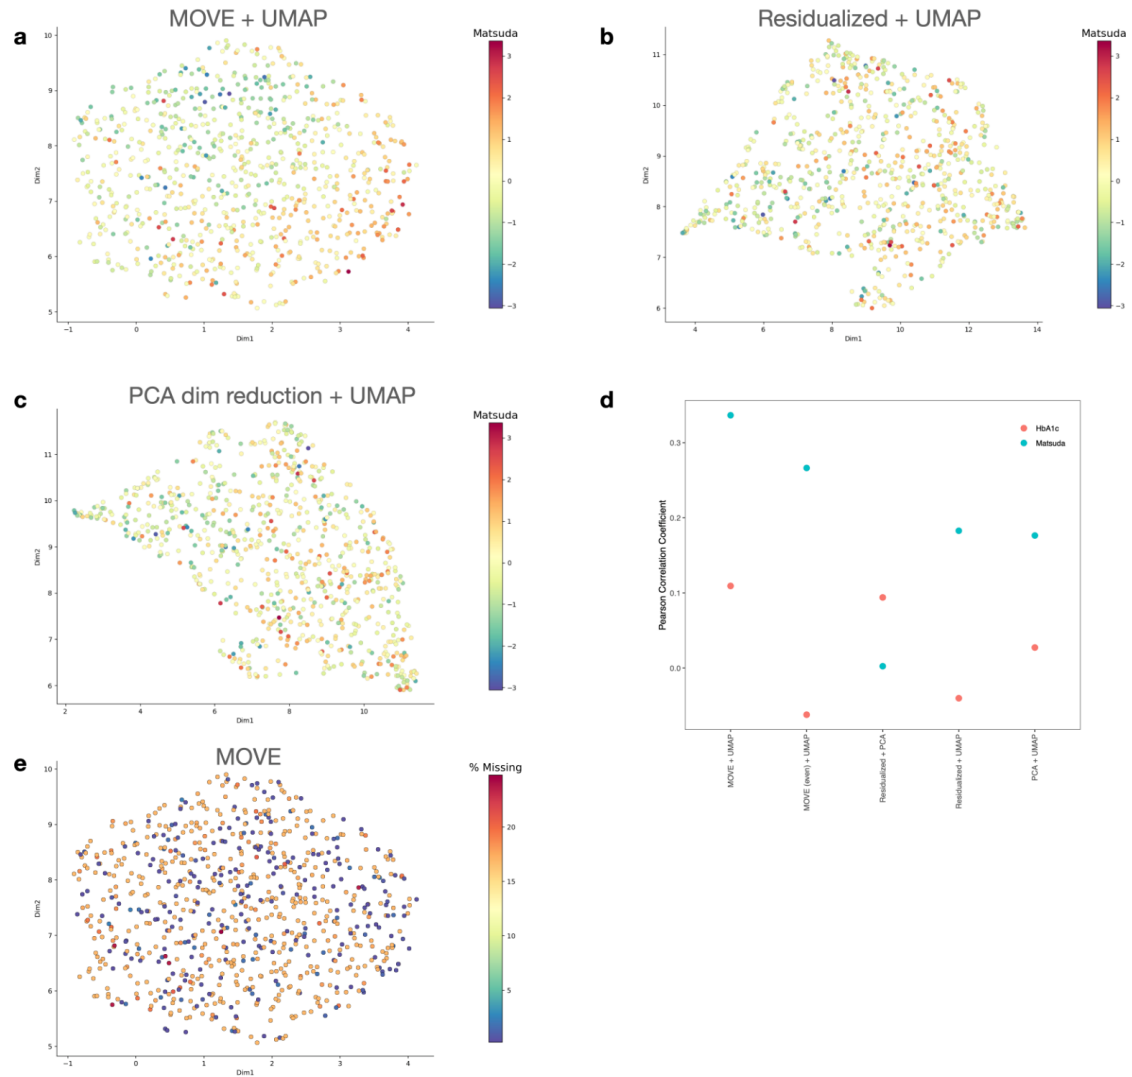

**Supplementary Figure 8. MOVE identifies clinically relevant patterns.** Using MOVE (a), (b) residualized data only, or (c) PCA as input to UMAP. Individuals are colored according to insulin sensitivity (Matsuda Index) from low (blue) to high (red). (d) Pearson correlation coefficient (PCC) of UMAP dimensions to HbA1c (red) and Matsuda index (blue). (e) UMAP of MOVE on residualized data where the individuals are colored according to percentage missing.

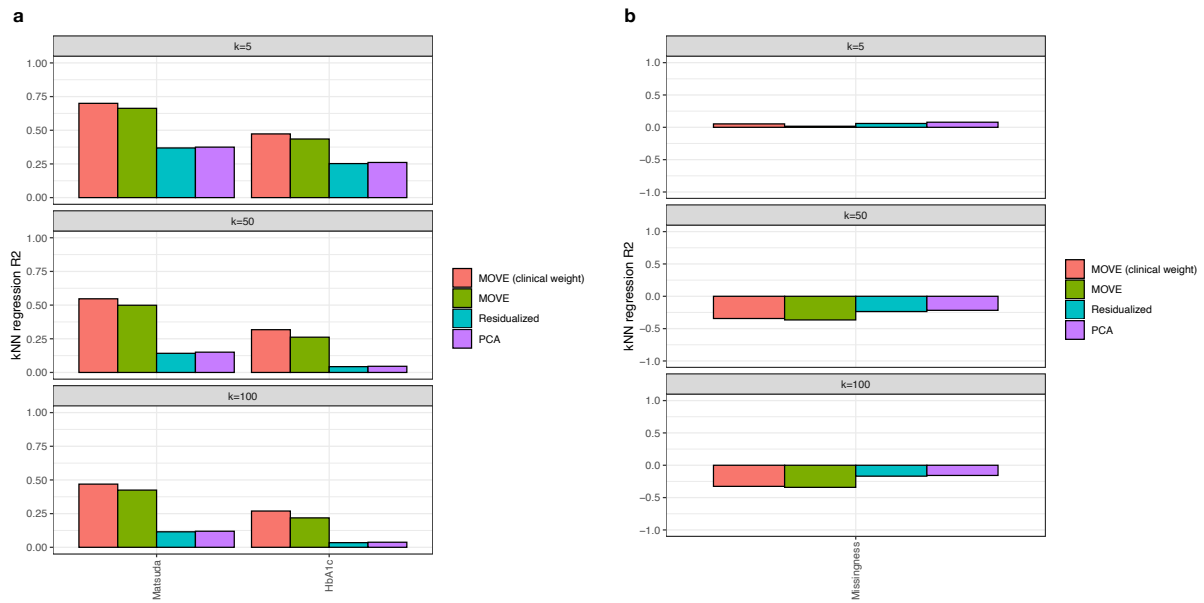

**Supplementary Figure 9. kNN regression shows that MOVE identifies clinically relevant patterns.** (a) kNN regression ( $k=5$ ,  $k=50$  and  $k=100$ ) based on the latent representation predicting Matsuda Index and HbA1c values from the nearest neighbors indicated by  $k$ .  $R^2$  (y-axis) indicates that MOVE (red and green) places the individuals with similar Matsuda Index and HbA1c values close in latent space (high  $R^2$ ) in comparison to using input data (Residualized, blue) or using PCA for dimensionality reduction (purple). This can be seen for all values of  $k$  indicating that this is the case for both local (small  $k$ ) and global (large  $k$ ) area of the latent space. (b) Similar to (a) but showing the influence of missingness on local to global structure of the latent space. Missingness has very low impact on the local structure of the latent space ( $R^2 < 0.06$  for MOVE).

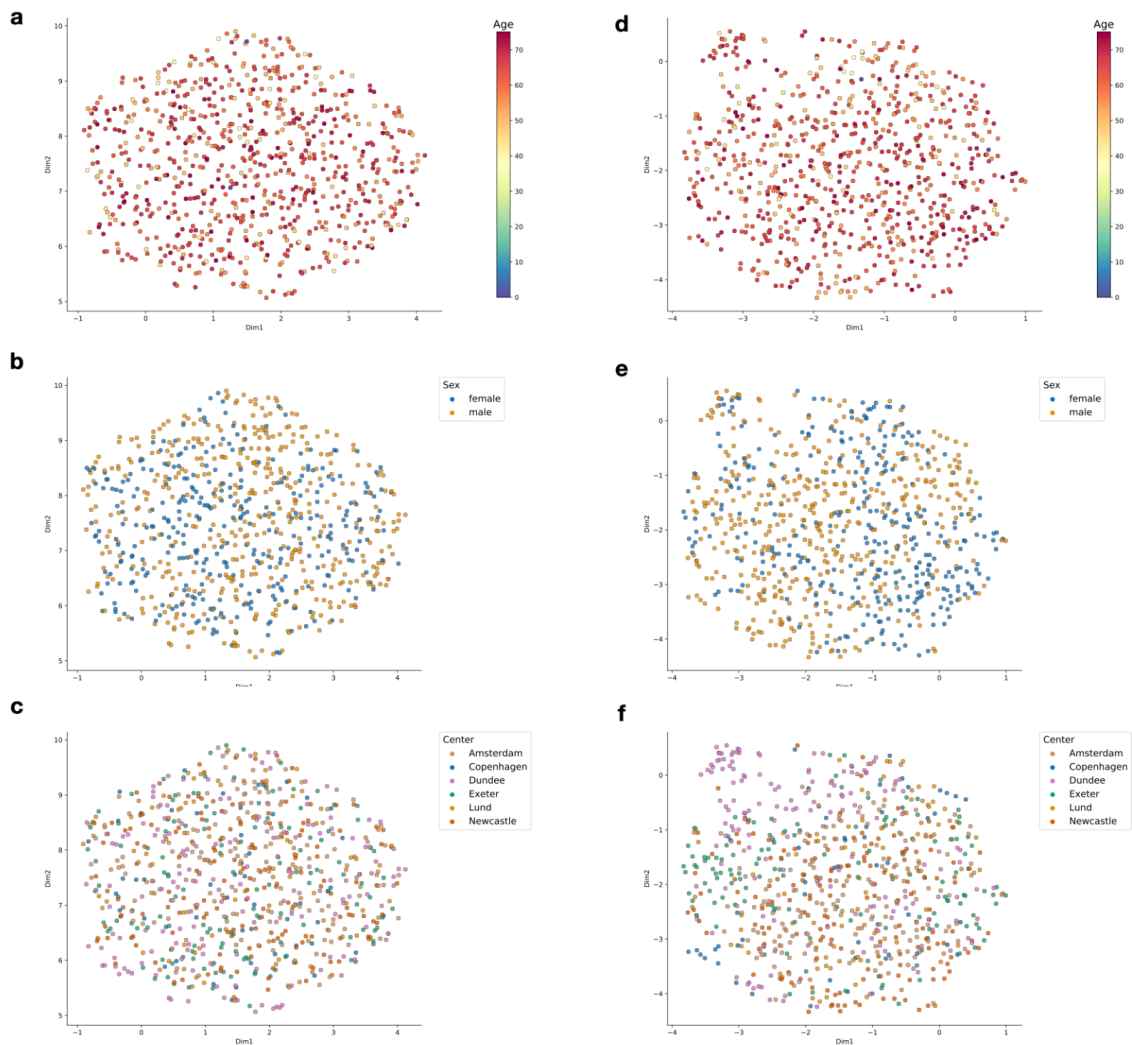

**Supplementary Figure 10. MOVE is resistant to confounding effects in the data.** UMAP of latent representation when applying MOVE to residualized data where the individuals are colored according to (a) age, (b) sex, and (c) center of recruitment. This can be compared to the UMAP of MOVE latent space on non-residualized data which is colored according to (d) age, (e) sex, and (f) center of recruitment.

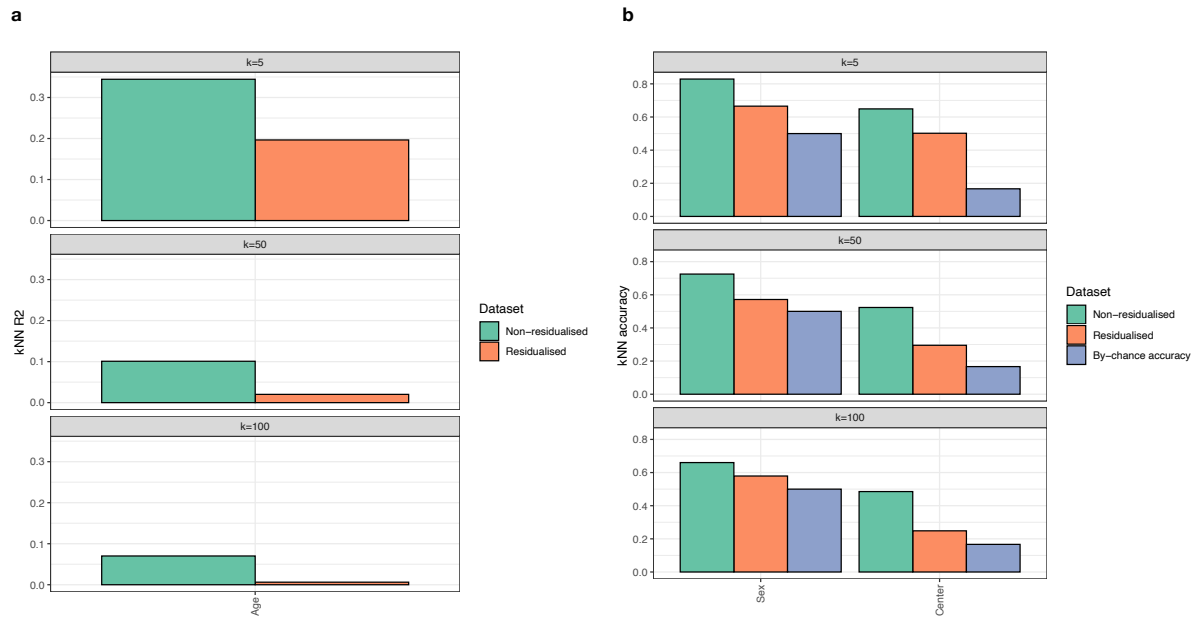

**Supplementary Figure 11. kNN regression and classification shows that MOVE is resistant to confounding effects in the data.** kNN regression for Age (a) and kNN classification for Sex and Center (b) using the latent representation by MOVE. Small  $k$  shows local structure whereas large  $k$  indicates a more global structure of the latent space. The plots show that residualizing (orange) reduces local and global structure of Age, Sex and Center compared to non-residualized data (green). For the residualized data there are little effect on the global structure ( $k=100$ ) of Age ( $R^2 < 0.01$ ), a small effect of Sex ( $R^2 = 0.58$ , by-chance accuracy 0.50 (purple)) and a small effect of recruitment center ( $R^2 = 0.25$ , by-chance accuracy 0.17 (purple)).

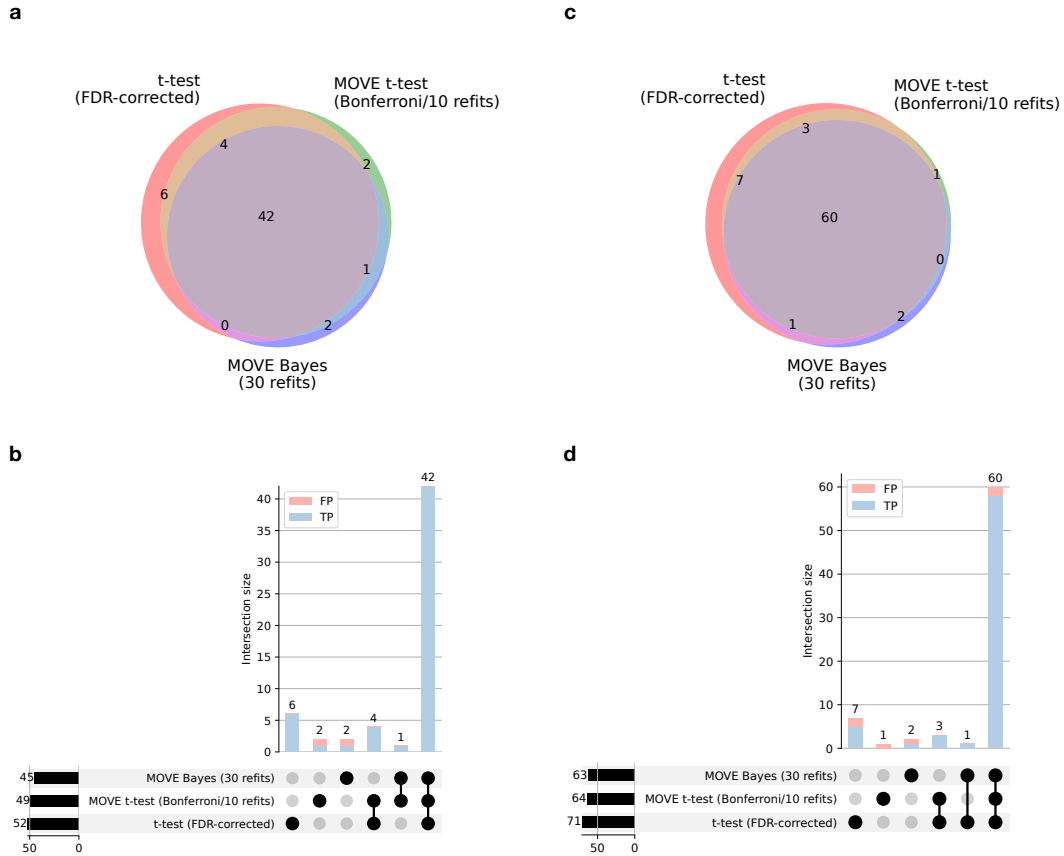

**Supplementary Figure 12. Overlap between methods in the two randomized data sets.**

Analysis of the two randomized (shuffled) data sets using T-test on residualized data compared to MOVE T-test and MOVE Bayes. We added 100 drug-omics effects sampled from  $N(0,1)$  to each of the shuffled data sets and therefore do not expect all to be significant in the statistical tests because some effects will be close to 0. Significance threshold was set at ground truth FDR 0.05. (a) Venn diagram of overlap in TP between the methods on shuffled data set 1. (b) Upset plot showing overlap in TP and FP for the methods on shuffled data set 1. (c) As a, but for shuffled data set 2. (d) As b, but for shuffled data set 2. TP: True positive, FP: False positive.

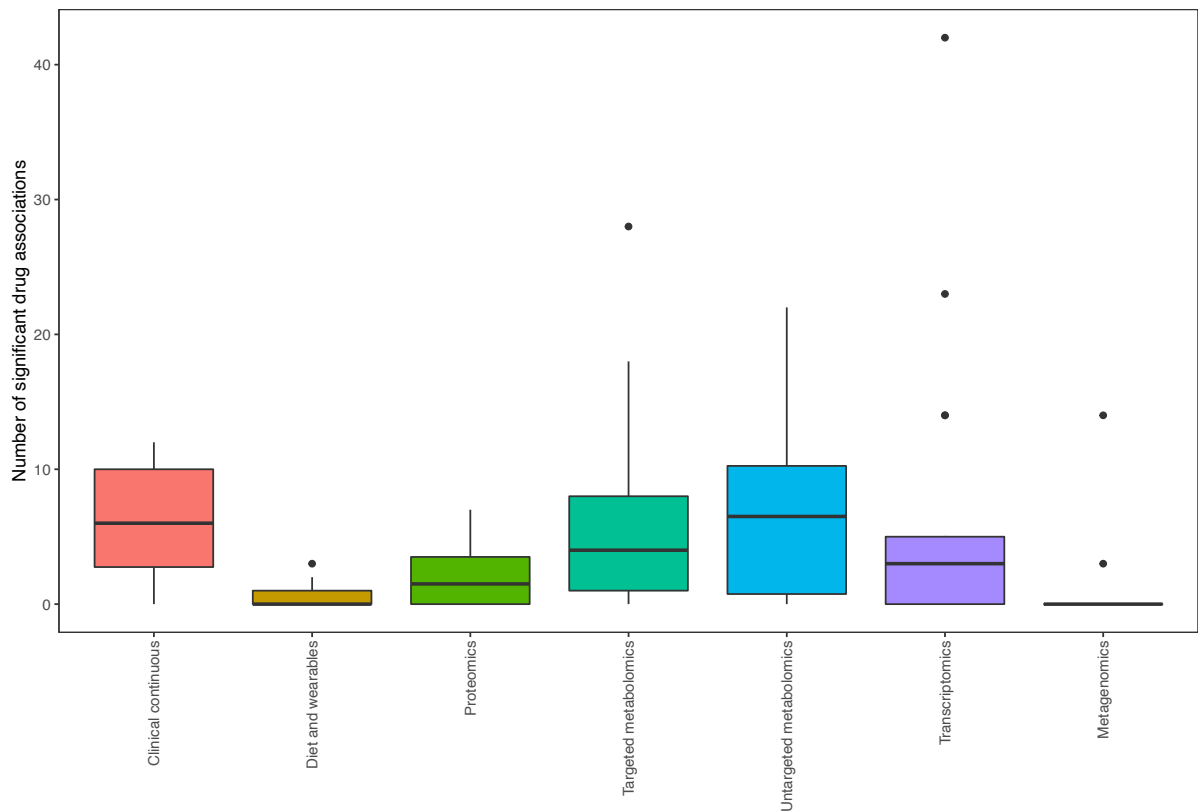

**Supplementary Figure 13. Absolute number of significant hits.** The number of features in the multi-omics datasets that were found by MOVE to be significantly associated with a drug ( $n=20$ ). The lower and upper hinges correspond to the first and third quartiles (25th and 75th percentiles). The upper and lower whiskers extend from the hinge to the highest and lowest values, respectively, but no further than  $1.5 \times$  interquartile range (IQR) from the hinge. IQR is the distance between the first and third quartiles. Data beyond the ends of whiskers are outliers and are plotted individually.



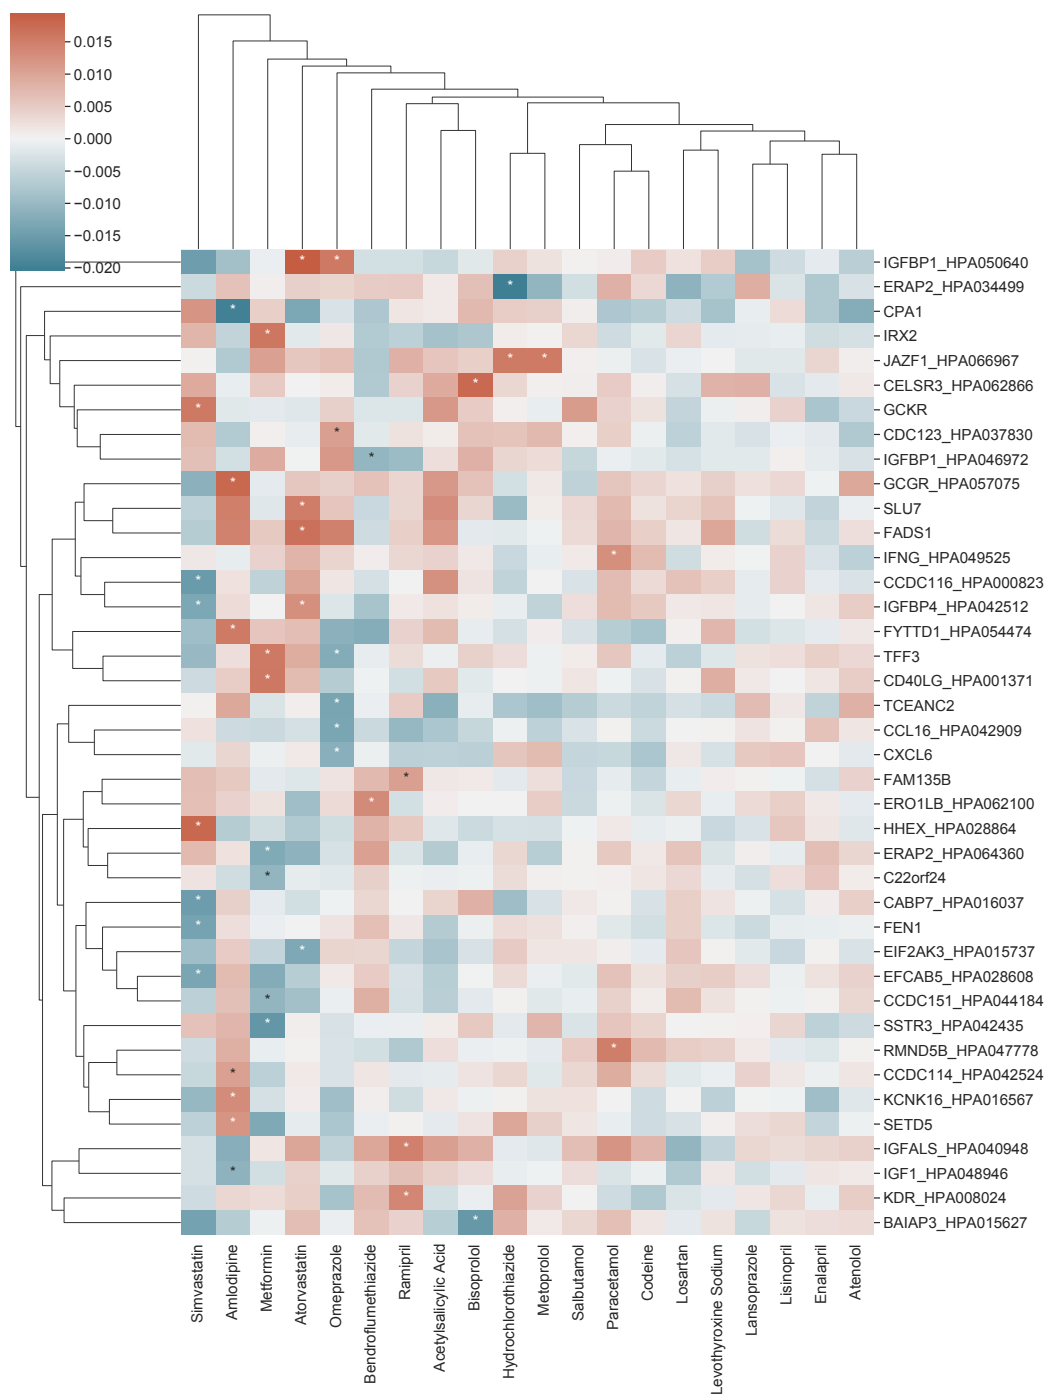

**Supplementary Figure 15. Association of drugs to proteomics data.** All proteomics features (y-axis) with at least one significant association to a drug (x-axis). The names of the features are given on the y-axis and can also be found in **Supplementary Data 4**. Significant drug and proteomics associations are indicated with an asterisk. Z-scaled effect size is indicated from negative (blue) to positive (red).

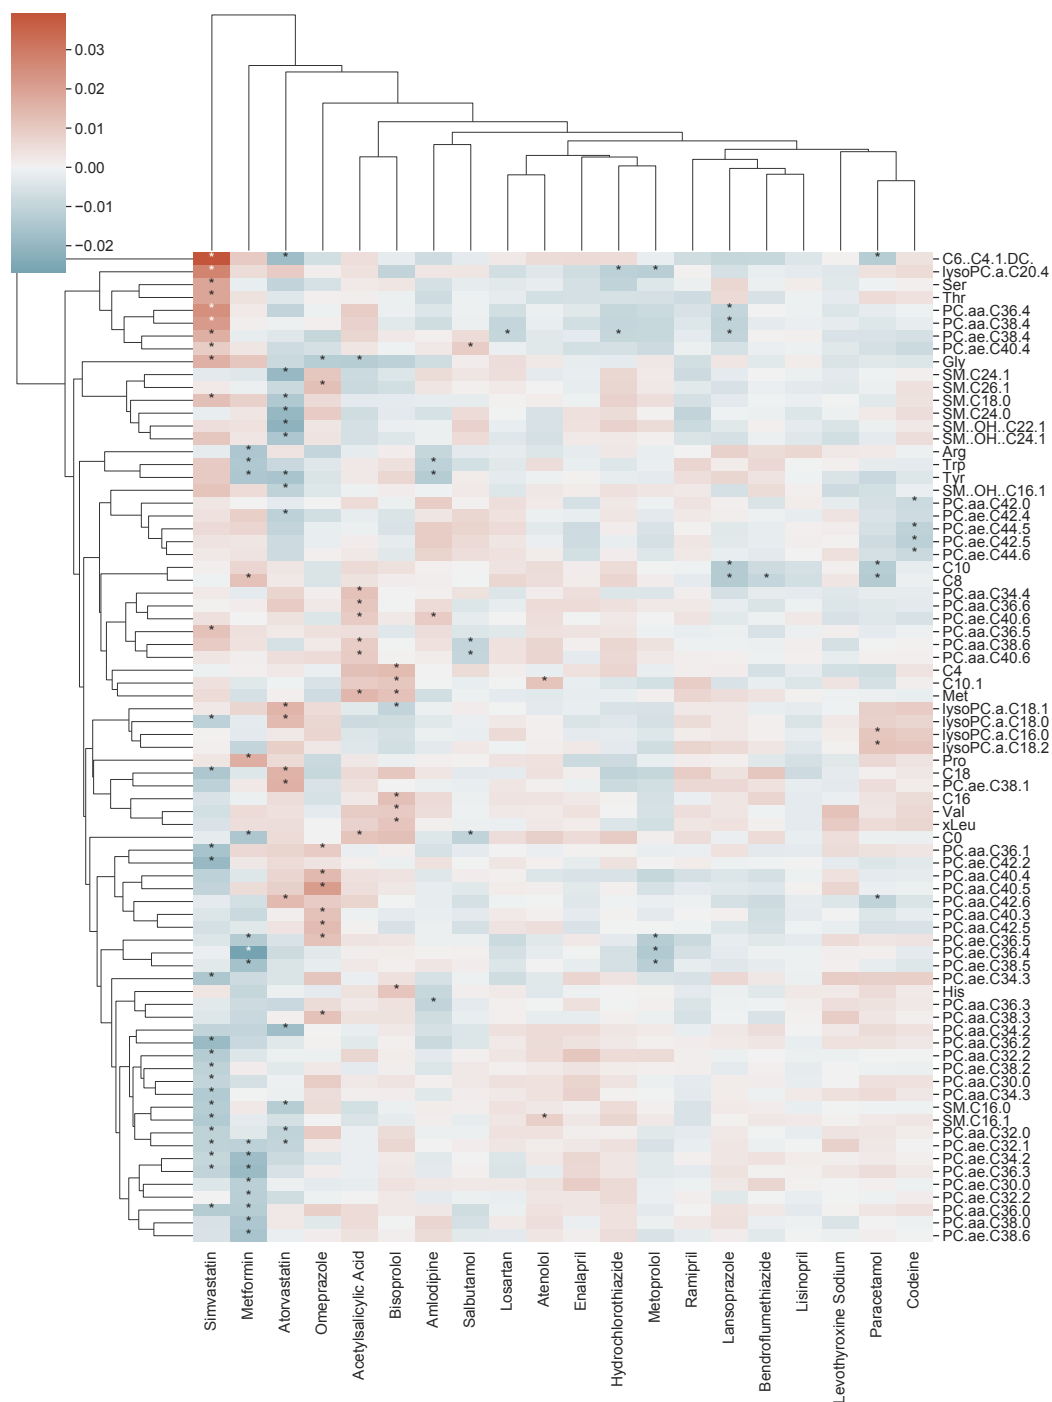

**Supplementary Figure 16. Associations of drugs to targeted metabolomics data.** All targeted metabolomics features (y-axis) with at least one significant association to a drug (x-axis) are shown. The names of the metabolomics features are given on the y-axis and can also be found in **Supplementary Data 4**. Significant drug and metabolomics associations are indicated with an asterisk. Z-scaled effect size is shown from negative (blue) to positive (red).

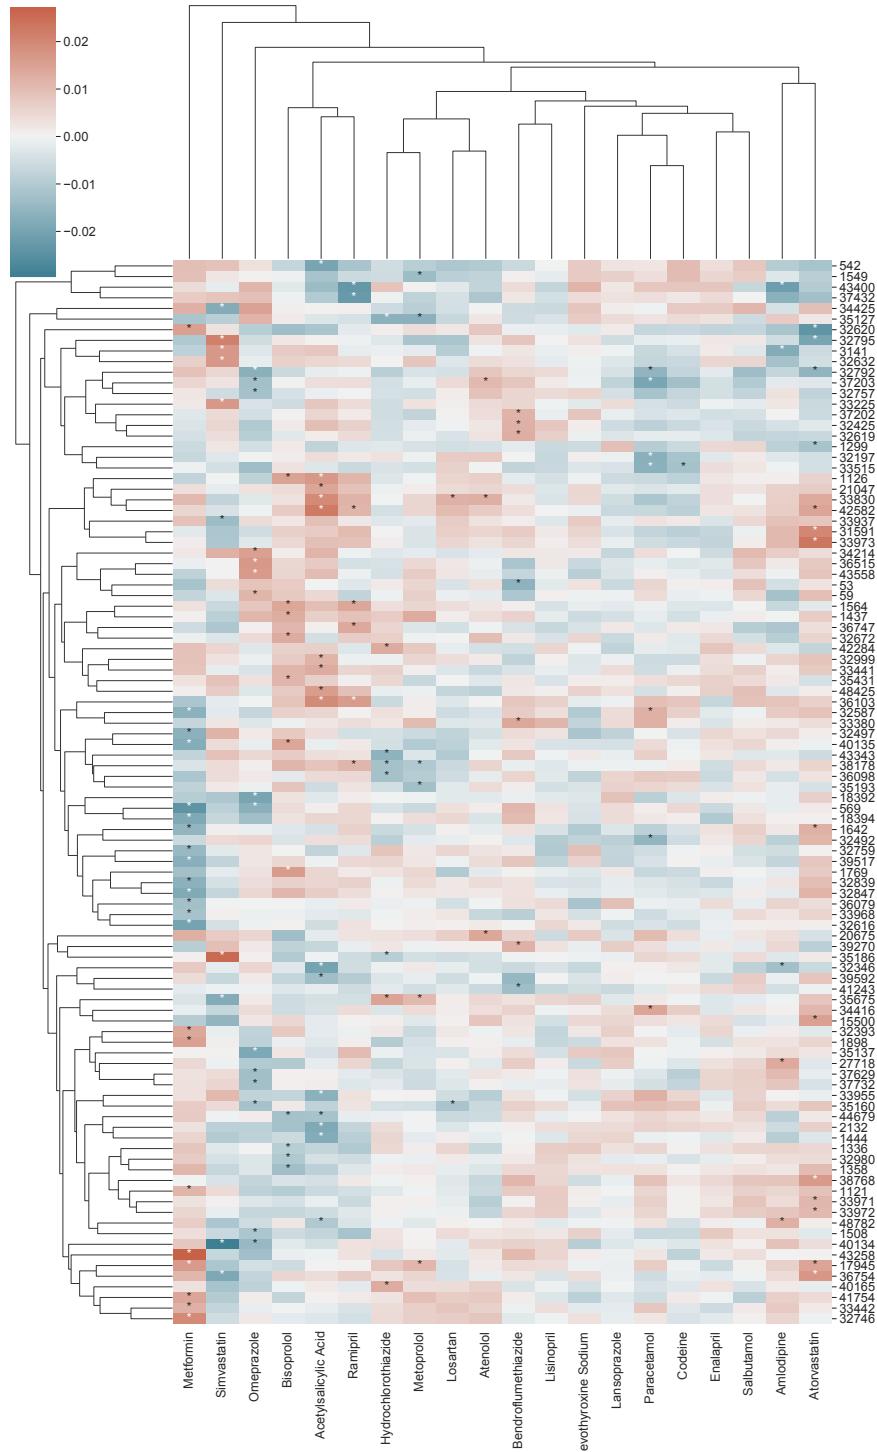

**Supplementary Figure 17. Associations of drugs to untargeted metabolomics data.** All untargeted metabolomics features (y-axis) with at least one significant association to a drug (x-axis) are shown. The names of the metabolomics features are not indicated but the data can be found in **Supplementary Data 4**. Significant drug and metabolomics associations are indicated with an asterisk. Z-scaled effect size is shown from negative (blue) to positive (red).

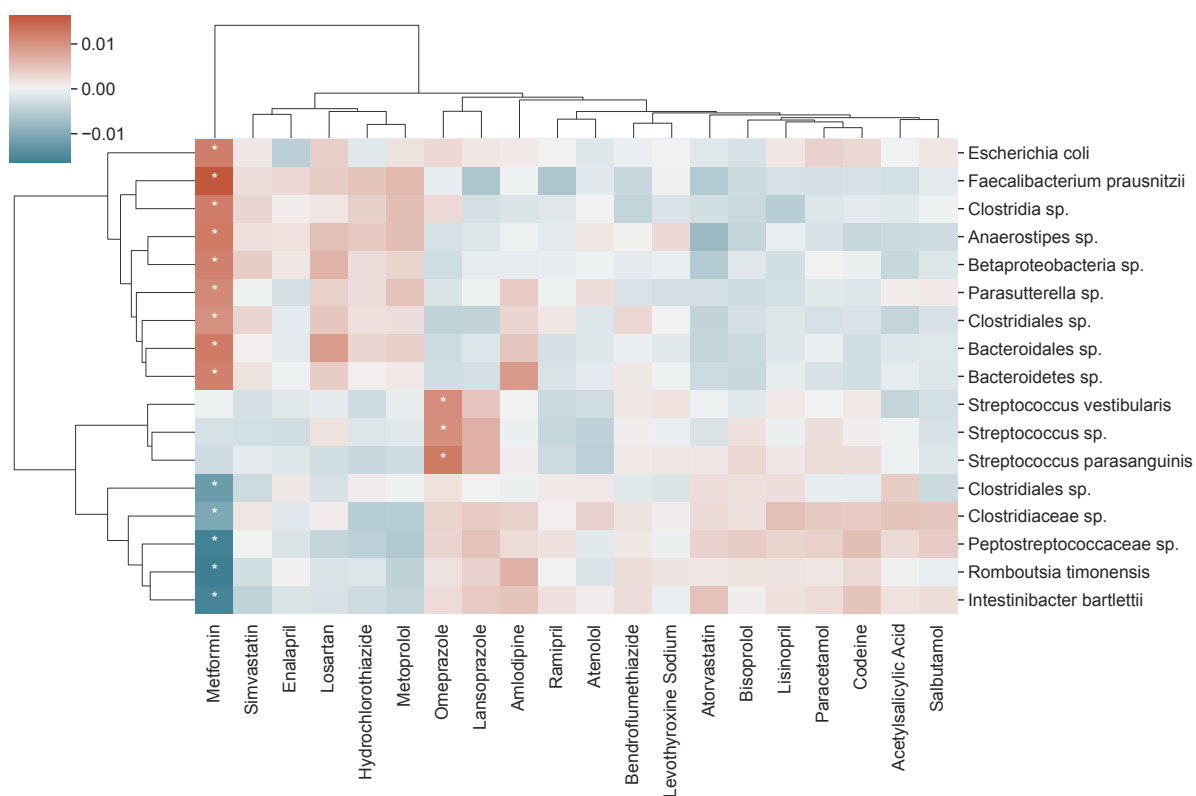

**Supplementary Figure 18. Associations of drugs to metagenomics data.** All metagenomics species (y-axis) with at least one significant association to a drug (x-axis) is shown. The name of the metagenomics species is indicated on the y-axis and can additionally be found in **Supplementary Data 4**. Significant drug and metagenomics associations are indicated with an asterisk. Z-scaled effect size is shown from negative (blue) to positive (red).

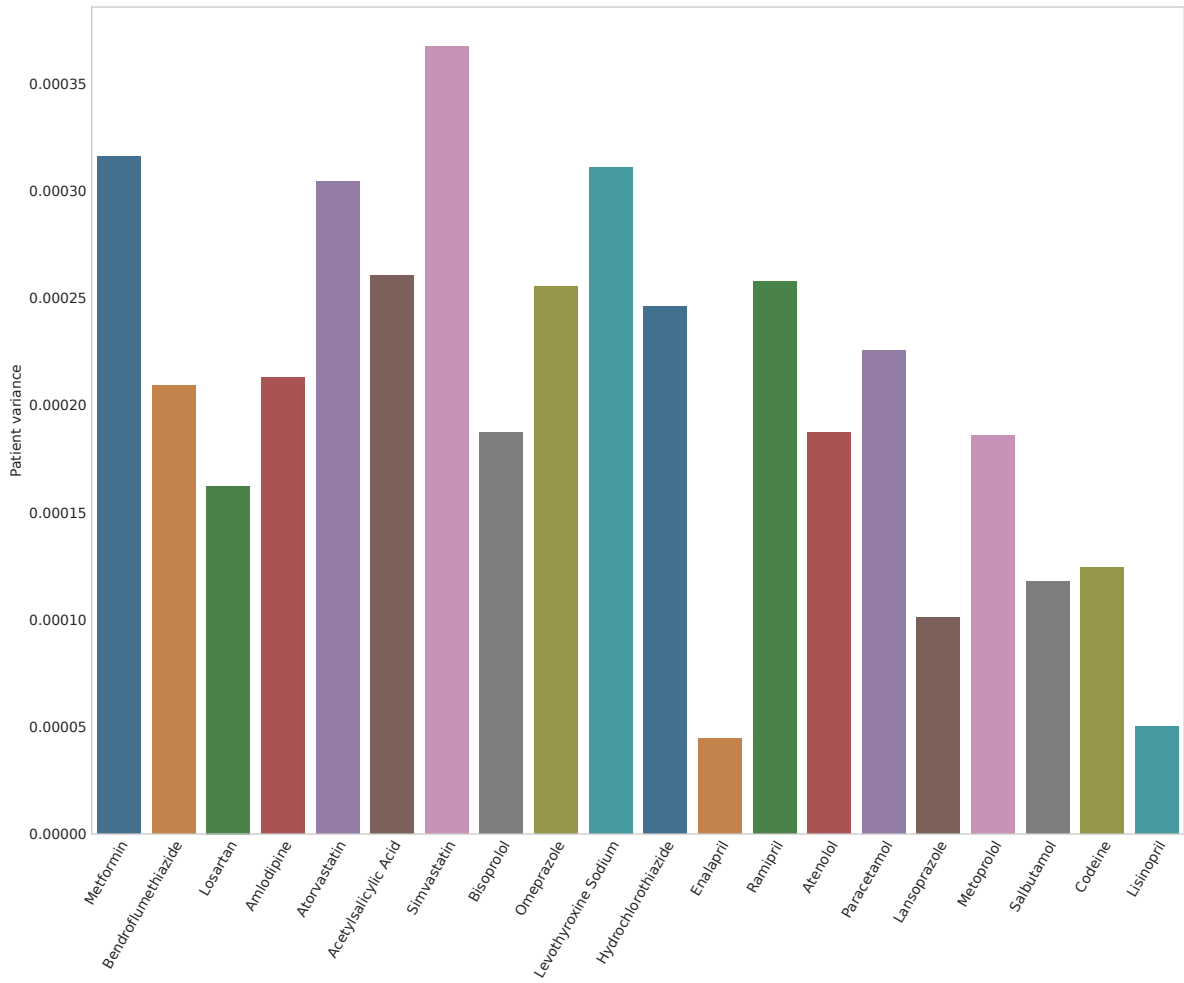

**Supplementary Figure 19. Inter person variation of significant drug multi-omics associations.** The variance in effect size predicted from individuals across the multi-omics datasets.

a

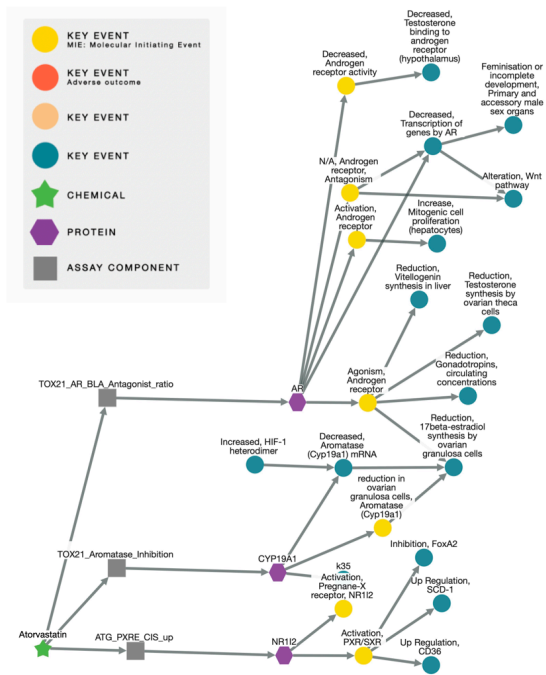

b

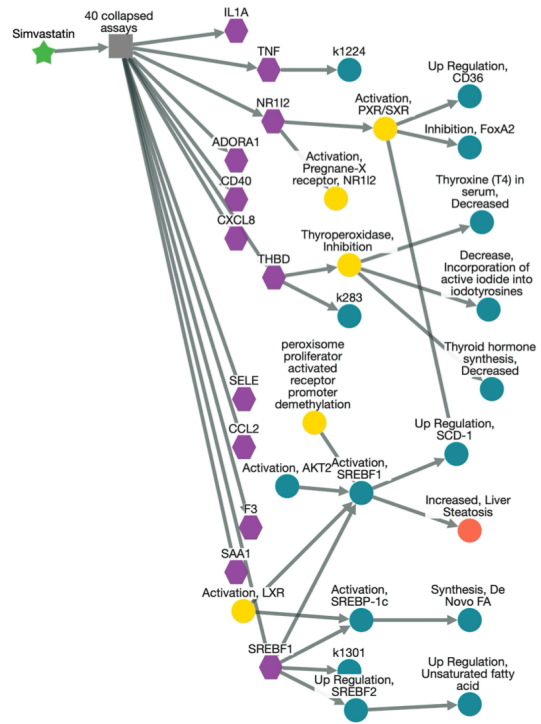

**Supplementary Figure 20. Adverse outcome pathways.** Adverse outcome pathway for atorvastatin (a) and simvastatin (b). Legend is indicated in (a).

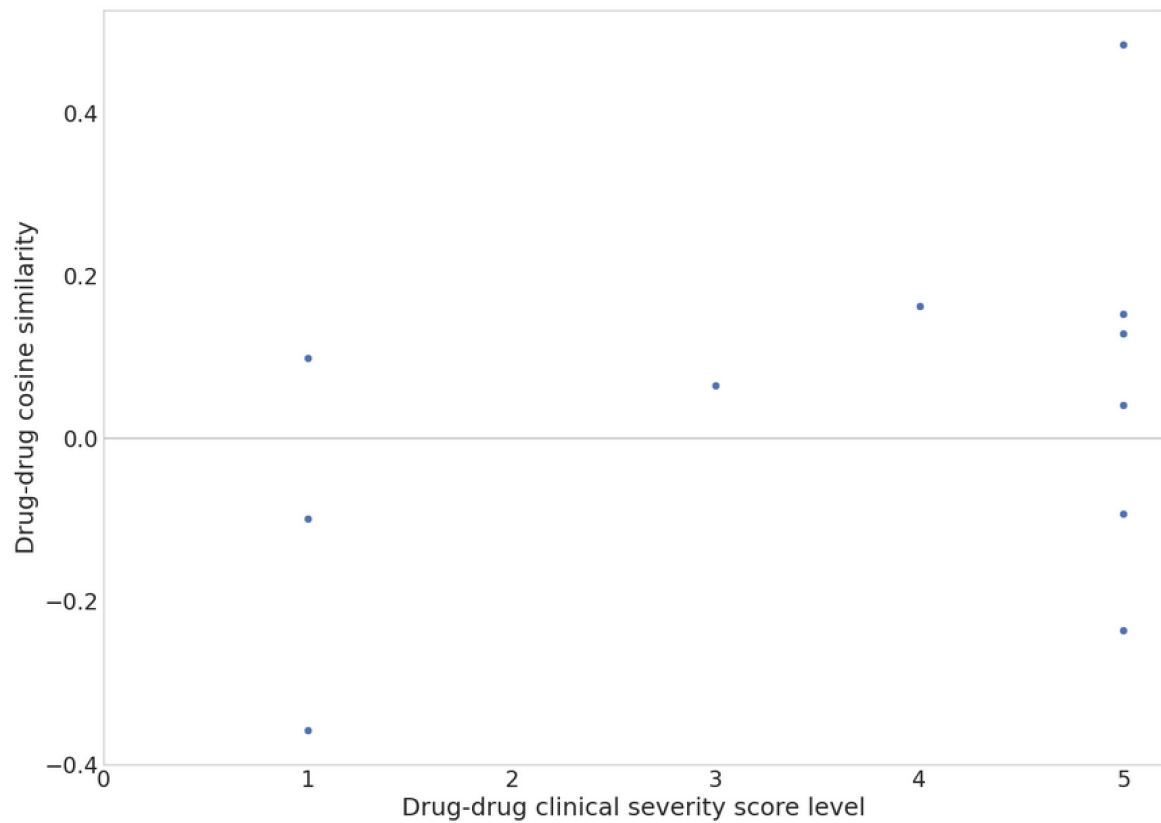

**Supplementary Figure 21. Correlation between drug-drug omics similarity and known drug-drug interactions.** Cosine similarity in the clinical changes between every drug-drug combination with a known clinical severity score plotted against the level of clinical severity. The score ranges from 1-5 translated to "no effect" (1), "undetermined" (2), "possible effect" (3), "minor effect" (4) or "moderate effect" (5). Two drug-drug interactions with undetermined effects (2 on the x-axis) were removed for the figure and correlation analyses.

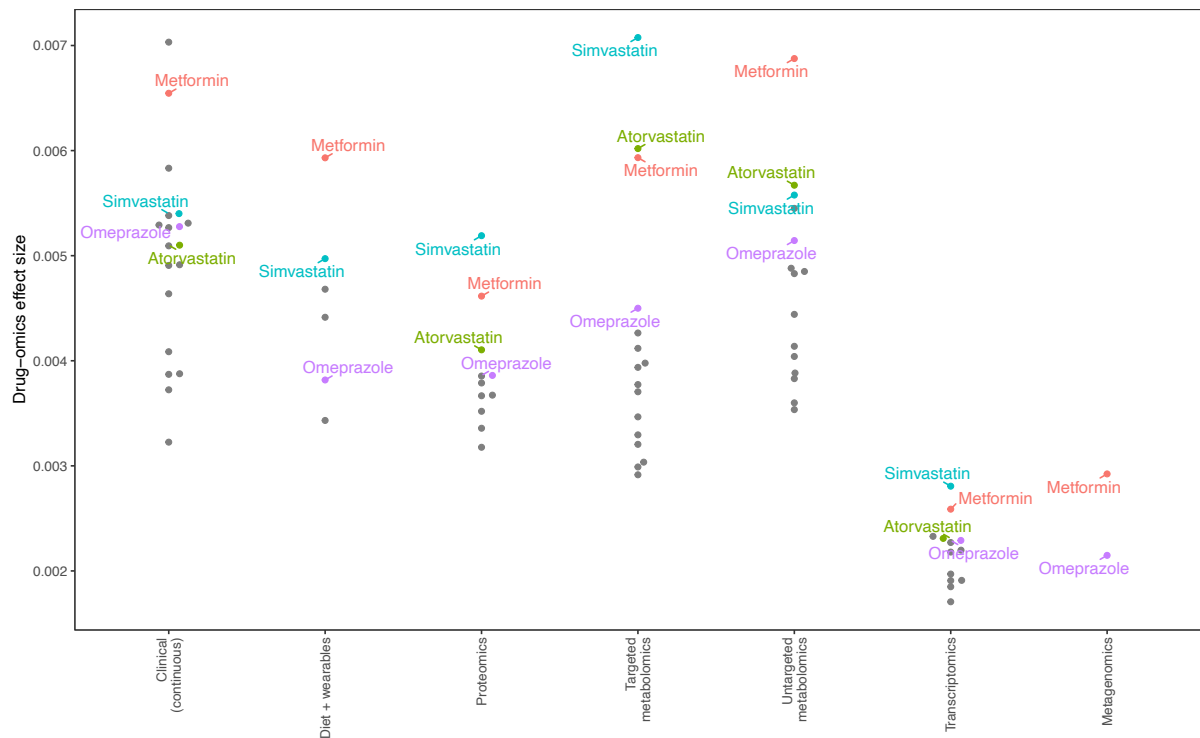

**Supplementary Figure 22. Effect sizes of drug and multi-omics associations stratified per omics dataset.** The z-scaled effect size (y-axis) of the significant drug and multi-omics features was stratified by the omics dataset (x-axis). As Figure 3d, but only including significant drug-omics associations. Drugs with no significant omics association for a particular data set have been omitted.

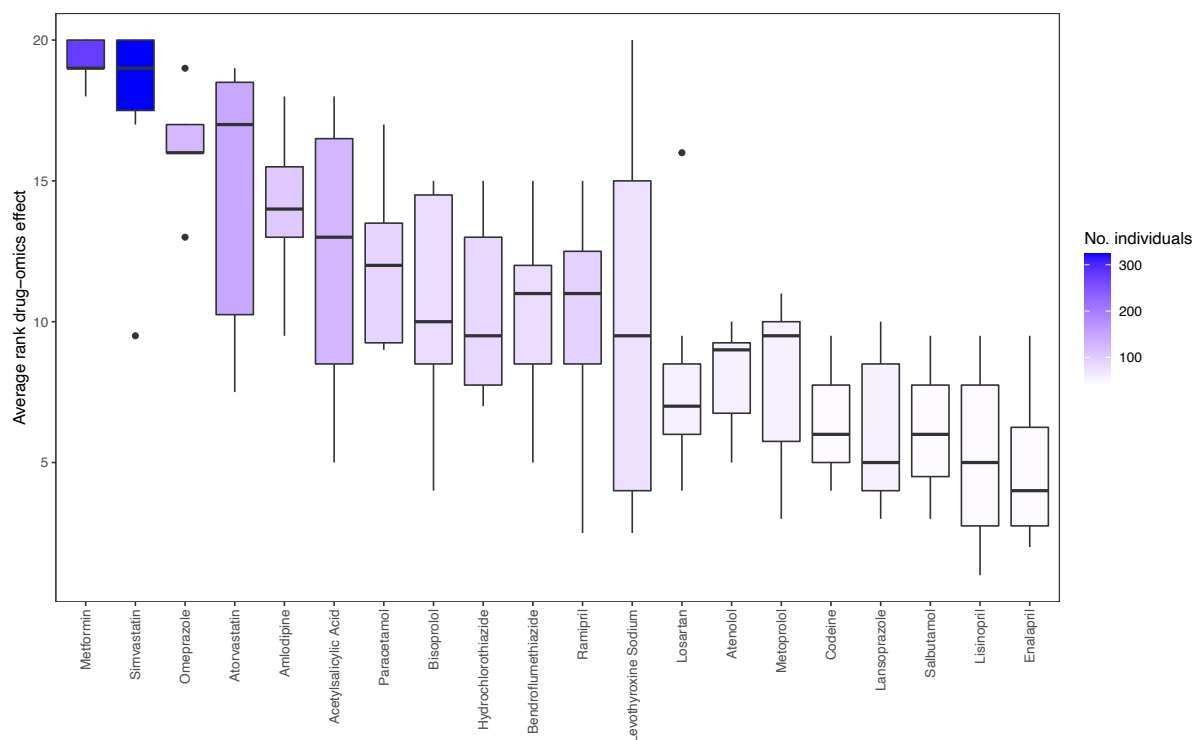

**Supplementary Figure 23. Distribution of multi-omics ranks for the different drugs when only considering significant hits.** The ranks are determined as a number between 1-20 (drugs) based on the average effect size shown in Supplementary Figure 18. The boxes are colored according to number of individuals taking a particular drug from 0 (white) to 391 (purple). There was a correlation between number of individuals taking a drug and the average rank (PCC=0.86). The lower and upper hinges correspond to the first and third quartiles (25th and 75th percentiles). The upper and lower whiskers extend from the hinge to the highest and lowest values, respectively, but no further than  $1.5 \times$  interquartile range (IQR) from the hinge. IQR is the distance between the first and third quartiles. Data beyond the ends of whiskers are outliers and are plotted individually.

| <b>Dataset</b>            | <b>Clinical (continuous)</b> | <b>Diet and wearables</b> | <b>Prote-omics</b> | <b>Targeted metabol-omics</b> | <b>Untargeted metabol-omics</b> | <b>Transcript -omics</b> | <b>Metagen -omics</b> |
|---------------------------|------------------------------|---------------------------|--------------------|-------------------------------|---------------------------------|--------------------------|-----------------------|
| <b>Number of features</b> | 76                           | 74                        | 373                | 119                           | 238                             | 6,018                    | 1,463                 |

| <b>Dataset</b>            | <b>Clinical (categorical)</b> | <b>Genomics</b> | <b>Drug data</b> |
|---------------------------|-------------------------------|-----------------|------------------|
| <b>Number of features</b> | 42                            | 393             | 20               |

**Supplementary Table 1. Size of included datasets.** Number of features included in the input dataset. The upper table shows continuous features whereas the lower table has categorical features.

| Drug                 | Metformin | Bendroflumethiazide | Losartan | Amlodipine | Atorvastatin | Acetylsalicylic Acid | Simvastatin | Bisoprolol | Omeprazole | Levothyroxine Sodium | Hydrochlorothiazide | Enalapril | Ramipril | Atenolol | Paracetamol | Lansoprazole | Metoprolol | Salbutamol | Codeine | Lisinopril |
|----------------------|-----------|---------------------|----------|------------|--------------|----------------------|-------------|------------|------------|----------------------|---------------------|-----------|----------|----------|-------------|--------------|------------|------------|---------|------------|
| Metformin            | 277       |                     |          |            |              |                      |             |            |            |                      |                     |           |          |          |             |              |            |            |         |            |
| Bendroflumethiazide  | 20        | 82                  |          |            |              |                      |             |            |            |                      |                     |           |          |          |             |              |            |            |         |            |
| Losartan             | 26        | 4                   | 58       |            |              |                      |             |            |            |                      |                     |           |          |          |             |              |            |            |         |            |
| Amlodipine           | 36        | 17                  | 15       | 105        |              |                      |             |            |            |                      |                     |           |          |          |             |              |            |            |         |            |
| Atorvastatin         | 46        | 15                  | 8        | 42         | 146          |                      |             |            |            |                      |                     |           |          |          |             |              |            |            |         |            |
| Acetylsalicylic Acid | 43        | 17                  | 7        | 27         | 42           | 129                  |             |            |            |                      |                     |           |          |          |             |              |            |            |         |            |
| Simvastatin          | 123       | 37                  | 23       | 33         | 1            | 58                   | 323         |            |            |                      |                     |           |          |          |             |              |            |            |         |            |
| Bisoprolol           | 23        | 6                   | 3        | 10         | 27           | 43                   | 31          | 82         |            |                      |                     |           |          |          |             |              |            |            |         |            |
| Omeprazole           | 45        | 10                  | 10       | 17         | 29           | 30                   | 48          | 20         | 125        |                      |                     |           |          |          |             |              |            |            |         |            |
| Levothyroxine Sodium | 31        | 9                   | 5        | 9          | 21           | 13                   | 29          | 8          | 17         | 76                   |                     |           |          |          |             |              |            |            |         |            |
| Hydrochlorothiazide  | 43        | 0                   | 15       | 11         | 10           | 14                   | 38          | 5          | 10         | 11                   | 87                  |           |          |          |             |              |            |            |         |            |
| Enalapril            | 20        | 5                   | 1        | 2          | 9            | 6                    | 20          | 5          | 5          | 9                    | 14                  | 47        |          |          |             |              |            |            |         |            |
| Ramipril             | 32        | 20                  | 0        | 17         | 35           | 40                   | 39          | 27         | 14         | 7                    | 4                   | 0         | 96       |          |             |              |            |            |         |            |
| Atenolol             | 19        | 12                  | 7        | 9          | 18           | 19                   | 23          | 0          | 7          | 4                    | 5                   | 7         | 14       | 59       |             |              |            |            |         |            |
| Paracetamol          | 31        | 18                  | 5        | 19         | 26           | 16                   | 35          | 14         | 26         | 15                   | 7                   | 2         | 14       | 5        | 90          |              |            |            |         |            |
| Lansoprazole         | 21        | 9                   | 1        | 13         | 16           | 8                    | 26          | 9          | 1          | 3                    | 3                   | 0         | 8        | 4        | 19          | 57           |            |            |         |            |
| Metoprolol           | 37        | 3                   | 9        | 6          | 10           | 19                   | 22          | 0          | 8          | 4                    | 28                  | 6         | 7        | 0        | 5           | 1            | 57         |            |         |            |
| Salbutamol           | 17        | 2                   | 4        | 6          | 14           | 9                    | 19          | 5          | 11         | 4                    | 1                   | 1         | 9        | 1        | 12          | 6            | 0          | 45         |         |            |
| Codeine              | 13        | 6                   | 1        | 7          | 16           | 5                    | 20          | 4          | 13         | 9                    | 3                   | 3         | 5        | 3        | 38          | 9            | 1          | 6          | 46      |            |
| Lisinopril           | 12        | 10                  | 1        | 9          | 12           | 11                   | 21          | 5          | 6          | 6                    | 6                   | 0         | 0        | 2        | 10          | 9            | 4          | 3          | 6       | 46         |

**Supplementary Table 2. Number of individuals administered a certain drug or drug combination.** Number of individuals taking each of the drug combinations included in the study. The diagonal represents the number of individuals that takes the drug. Individuals taking a combination within the same therapeutic ATC group was not included in the analysis of those drugs.

| Method              | Multiple correction | Refits | Shuffle 1 |    |             |      | Shuffle 2 |    |             |      |
|---------------------|---------------------|--------|-----------|----|-------------|------|-----------|----|-------------|------|
|                     |                     |        | TP        | FP | FDR (truth) | AUC  | TP        | FP | FDR (truth) | AUC  |
| T-test              | Bonferroni          | NA     | 49        | 0  | 0.00        | 0.93 | 62        | 4  | 0.06        | 0.91 |
| T-test              | FDR BH 0.05         | NA     | 56        | 6  | 0.10        | 0.92 | 67        | 12 | 0.15        | 0.91 |
| <b>T-test*</b>      | FDR BH 0.01         | NA     | 52        | 0  | 0.00        | 0.92 | 67        | 4  | 0.06        | 0.91 |
| T-test              | FDR BH 0.001        | NA     | 49        | 0  | 0.00        | 0.92 | 62        | 4  | 0.06        | 0.91 |
| T-test              | FDR BH 0.0001       | NA     | 43        | 0  | 0.00        | 0.92 | 59        | 3  | 0.05        | 0.91 |
|                     |                     |        |           |    |             |      |           |    |             |      |
| MOVE T-test         | MS-Bonferroni       | 1      | 44        | 10 | 0.19        | 0.86 | 60        | 11 | 0.15        | 0.86 |
| MOVE T-test         | MS-Bonferroni       | 5      | 47        | 2  | 0.04        | 0.89 | 60        | 4  | 0.06        | 0.88 |
| <b>MOVE T-test*</b> | MS-Bonferroni       | 10     | 48        | 1  | 0.02        | 0.90 | 61        | 3  | 0.05        | 0.88 |
| MOVE T-test         | MS-Bonferroni       | 15     | 46        | 1  | 0.02        | 0.90 | 61        | 2  | 0.03        | 0.89 |
| MOVE T-test         | MS-Bonferroni       | 20     | 47        | 2  | 0.04        | 0.91 | 62        | 2  | 0.03        | 0.89 |
| MOVE T-test         | MS-Bonferroni       | 30     | 48        | 1  | 0.02        | 0.91 | 61        | 2  | 0.03        | 0.90 |
| MOVE T-test         | MS-Bonferroni       | 35     | 48        | 0  | 0.00        | 0.91 | 60        | 2  | 0.03        | 0.89 |
| MOVE T-test         | MS-Bonferroni       | 40     | 48        | 1  | 0.02        | 0.91 | 61        | 2  | 0.03        | 0.89 |
| MOVE T-test         | MS-Bonferroni       | 50     | 48        | 0  | 0.00        | 0.91 | 61        | 2  | 0.03        | 0.88 |
|                     |                     |        |           |    |             |      |           |    |             |      |
| MOVE Bayes          | FDR Bayes 0.05      | 1      | 0         | 0  | NA          | 0.86 | 0         | 0  | NA          | 0.85 |
| MOVE Bayes          | FDR Bayes 0.05      | 5      | 5         | 0  | 0.00        | 0.92 | 2         | 0  | 0.00        | 0.89 |
| MOVE Bayes          | FDR Bayes 0.05      | 10     | 16        | 0  | 0.00        | 0.92 | 17        | 1  | 0.06        | 0.88 |
| MOVE Bayes          | FDR Bayes 0.05      | 15     | 26        | 0  | 0.00        | 0.93 | 35        | 1  | 0.03        | 0.92 |
| MOVE Bayes          | FDR Bayes 0.05      | 20     | 34        | 0  | 0.00        | 0.93 | 45        | 1  | 0.02        | 0.92 |
| <b>MOVE Bayes*</b>  | FDR Bayes 0.05      | 30     | 44        | 1  | 0.02        | 0.92 | 60        | 3  | 0.05        | 0.91 |
| MOVE Bayes          | FDR Bayes 0.05      | 35     | 46        | 3  | 0.06        | 0.93 | 60        | 8  | 0.12        | 0.92 |
| MOVE Bayes          | FDR Bayes 0.05      | 40     | 49        | 5  | 0.09        | 0.93 | 62        | 11 | 0.15        | 0.91 |
| MOVE Bayes          | FDR Bayes 0.05      | 50     | 54        | 10 | 0.16        | 0.93 | 65        | 19 | 0.23        | 0.91 |

**Supplementary Table 3. Selecting number of variational refits and determining ground truth FDR.** We selected the number of variational refits for the MOVE T-test and MOVE Bayes tests models based on shuffling the input data and adding 100 drug-omics effects sampled from  $N(0,1)$ . We repeated the shuffling resulting in two data sets, Shuffle 1 and Shuffle 2. Here we found that the MOVE T-test approach had high TP and low FP from 10 refits with ground truth FDR of  $\sim 0.05$ . Note that the MOVE T-test approach is an ensemble of four different models and thus 10 refits represent 40 refits across the 4 models in total. For the MOVE Bayes test approach, we identified 30 refits as the optimal model. For comparison to a standard T-test we found Benjamini-Hochberg correcting the p-values to 0.01 was equivalent of a ground truth FDR of 0.05. Models indicated with an asterisks and bold were the ones chosen. MS-Bonferroni: Multi-stage Bonferroni as we use Bonferroni correction for

each model and enforce drug-omics associations to be significant in at least 50% of refits and in 3 of 4 models. FDR: False Discovery Rate, BH: Benjamini-Hochberg, TP: True Positive, FP: False Positive, AUC: Area Under Curve.

| Drug                 | Clinical continuous | Diet and wearables | Prote-omics | Targeted metabolomics | Untargeted metabolomics | Transcript-omics | Metagen-omics |
|----------------------|---------------------|--------------------|-------------|-----------------------|-------------------------|------------------|---------------|
| Acetylsalicylic Acid | 10                  | 0                  | 0           | 8                     | 16                      | 5                | 0             |
| Amlodipine           | 7                   | 2                  | 7           | 4                     | 5                       | 23               | 0             |
| Atenolol             | 3                   | 0                  | 0           | 2                     | 3                       | 5                | 0             |
| Atorvastatin         | 4                   | 0                  | 5           | 18                    | 14                      | 4                | 0             |
| Bendroflumethiazide  | 2                   | 0                  | 2           | 1                     | 7                       | 1                | 0             |
| Bisoprolol           | 10                  | 0                  | 2           | 8                     | 11                      | 0                | 0             |
| Codeine              | 2                   | 0                  | 0           | 4                     | 1                       | 0                | 0             |
| Enalapril            | 1                   | 0                  | 0           | 0                     | 0                       | 0                | 0             |
| Hydrochlorothiazide  | 6                   | 0                  | 2           | 2                     | 8                       | 1                | 0             |
| Lansoprazole         | 2                   | 0                  | 0           | 5                     | 0                       | 0                | 0             |
| Levothyroxine Sodium | 12                  | 3                  | 0           | 0                     | 0                       | 5                | 0             |
| Lisinopril           | 0                   | 0                  | 0           | 0                     | 0                       | 2                | 0             |
| Losartan             | 10                  | 0                  | 0           | 1                     | 2                       | 0                | 0             |
| Metformin            | 12                  | 2                  | 7           | 17                    | 22                      | 14               | 14            |
| Metoprolol           | 3                   | 0                  | 1           | 4                     | 6                       | 0                | 0             |
| Omeprazole           | 10                  | 2                  | 6           | 9                     | 15                      | 14               | 3             |
| Paracetamol          | 6                   | 1                  | 2           | 6                     | 7                       | 4                | 0             |
| Ramipril             | 9                   | 0                  | 3           | 0                     | 7                       | 4                | 0             |
| Salbutamol           | 8                   | 0                  | 0           | 4                     | 0                       | 0                | 0             |
| Simvastatin          | 5                   | 1                  | 7           | 28                    | 10                      | 42               | 0             |
| Total                | 122                 | 11                 | 44          | 121                   | 134                     | 124              | 17            |

**Supplementary Table 4. Significant associations between drugs and omics datasets from the overlap between MOVE T-test and MOVE Bayes.**

| Drug                 | ATC subgroups | Individuals with drug | No drug data | Individuals with ATC drug | Individuals without ATC drug |
|----------------------|---------------|-----------------------|--------------|---------------------------|------------------------------|
| Acetylsalicylic Acid | B01,N02,A01   | 129                   | 68           | 203                       | 518                          |
| Amlodipine           | C08           | 105                   | 68           | 105                       | 616                          |
| Atenolol             | C07           | 59                    | 68           | 198                       | 523                          |
| Atorvastatin         | C10           | 146                   | 68           | 468                       | 253                          |
| Bendroflumethiazide  | C03           | 82                    | 68           | 169                       | 552                          |
| Bisoprolol           | C07           | 82                    | 68           | 198                       | 523                          |
| Codeine              | R05           | 46                    | 68           | 46                        | 675                          |
| Enalapril            | C09           | 47                    | 68           | 245                       | 476                          |
| Hydrochlorothiazide  | C03           | 87                    | 68           | 169                       | 552                          |
| Lansoprazole         | A02           | 57                    | 68           | 181                       | 540                          |
| Levothyroxine Sodium | H03           | 76                    | 68           | 76                        | 645                          |
| Lisinopril           | C09           | 46                    | 68           | 245                       | 476                          |
| Losartan             | C09           | 58                    | 68           | 245                       | 476                          |
| Metformin            | A10           | 277                   | 0            | 277                       | 512                          |
| Metoprolol           | C07           | 57                    | 68           | 198                       | 523                          |
| Omeprazole           | A02           | 125                   | 68           | 181                       | 540                          |
| Paracetamol          | N02           | 90                    | 68           | 203                       | 518                          |
| Ramipril             | C09           | 96                    | 68           | 245                       | 476                          |
| Salbutamol           | R03           | 45                    | 68           | 45                        | 676                          |
| Simvastatin          | C10           | 323                   | 68           | 468                       | 253                          |

**Supplementary Table 5. Sample sizes (n) for the association analyses of drugs vs. multi-omics features.** We calculated significantly associated drug multi-omics associations using the MOVE t-test and MOVE Bayes frameworks. By comparing baseline models (no change in drug status) with models where the drug status was changed from 0 to 1, we could identify significant drug multi-omics associations. The sample size for each of the drug tests was therefore the number of individuals (789) subtracting the number of individuals administered the drug within the same ATC class and the number of individuals with unknown status for the particular drug ('Individuals without ATC drug').

| Drug                 | T-test | ANOVA | MOVE T-test | MOVE Bayes | MOVE Overlap | Diff MOVE Overlap vs T-test |
|----------------------|--------|-------|-------------|------------|--------------|-----------------------------|
| Acetylsalicylic Acid | 1      | 1     | 297         | 54         | 39           | 38                          |
| Amlodipine           | 0      | 0     | 352         | 59         | 48           | 48                          |
| Atenolol             | 0      | 0     | 82          | 14         | 13           | 13                          |
| Atorvastatin         | 71     | 71    | 62          | 65         | 45           | -26                         |
| Bendroflumethiazide  | 2      | 2     | 125         | 19         | 13           | 11                          |
| Bisoprolol           | 0      | 0     | 124         | 38         | 31           | 31                          |
| Codeine              | 2      | 2     | 123         | 10         | 7            | 5                           |
| Enalapril            | 0      | 0     | 23          | 1          | 1            | 1                           |
| Hydrochlorothiazide  | 0      | 0     | 214         | 21         | 19           | 19                          |
| Lansoprazole         | 3      | 1     | 60          | 13         | 7            | 4                           |
| Levothyroxine Sodium | 0      | 0     | 187         | 32         | 20           | 20                          |
| Lisinopril           | 1      | 2     | 43          | 6          | 2            | 1                           |
| Losartan             | 0      | 0     | 71          | 21         | 13           | 13                          |
| Metformin            | 21     | 17    | 425         | 106        | 88           | 67                          |
| Metoprolol           | 0      | 0     | 78          | 15         | 14           | 14                          |
| Omeprazole           | 5      | 0     | 288         | 63         | 59           | 54                          |
| Paracetamol          | 4      | 2     | 198         | 33         | 26           | 22                          |
| Ramipril             | 0      | 0     | 136         | 27         | 23           | 23                          |
| Salbutamol           | 1      | 0     | 135         | 14         | 12           | 11                          |
| Simvastatin          | 73     | 73    | 120         | 152        | 93           | 20                          |
| Total                | 184    | 171   | 3,143       | 763        | 573          | 389                         |
| Median               | 1      | 0     | 125         | 24         | 20           | 19                          |

**Supplementary Table 6. Significant drug and multi-omics associations.** Number of significant drug multi-omics associations identified when applying T-test and ANOVA to the residualized data compared to using the MOVE framework with T-test or Bayes test. Significance was set to estimated ground truth FDR 0.05 and statistical tests used were two-sided.

| Drug                 | Cluster<br>A<br>n=103 | Cluster<br>B<br>n=22 | Cluster<br>C<br>n=84 | Cluster<br>D<br>n=45 | Mixed<br>cluster<br>n=472 | Total<br>signif<br>omics | % with<br>archetype |
|----------------------|-----------------------|----------------------|----------------------|----------------------|---------------------------|--------------------------|---------------------|
| Acetylsalicylic Acid | 3                     | 0                    | 1                    | 0                    | 0                         | 39                       | 7.7                 |
| Amlodipine           | 7                     | 0                    | 1                    | 1                    | 0                         | 48                       | 16.7                |
| Atenolol             | 0                     | 0                    | 0                    | 0                    | 0                         | 13                       | 0.0                 |
| Atorvastatin         | 1                     | 0                    | 0                    | 1                    | 0                         | 45                       | 4.4                 |
| Bendroflumethiazide  | 0                     | 1                    | 1                    | 0                    | 0                         | 13                       | 15.4                |
| Bisoprolol           | 1                     | 0                    | 0                    | 0                    | 0                         | 31                       | 3.2                 |
| Codeine              | 1                     | 0                    | 0                    | 1                    | 0                         | 7                        | 28.6                |
| Enalapril            | 0                     | 0                    | 0                    | 0                    | 0                         | 1                        | 0.0                 |
| Hydrochlorothiazide  | 0                     | 0                    | 0                    | 0                    | 0                         | 19                       | 0.0                 |
| Lansoprazole         | 0                     | 0                    | 0                    | 0                    | 0                         | 7                        | 0.0                 |
| Levothyroxine Sodium | 1                     | 0                    | 0                    | 0                    | 0                         | 20                       | 5.0                 |
| Lisinopril           | 0                     | 0                    | 0                    | 0                    | 0                         | 2                        | 0.0                 |
| Losartan             | 1                     | 1                    | 0                    | 0                    | 0                         | 13                       | 7.7                 |
| Metformin            | 6                     | 1                    | 2                    | 0                    | 0                         | 88                       | 9.1                 |
| Metoprolol           | 0                     | 0                    | 0                    | 0                    | 0                         | 14                       | 0.0                 |
| Omeprazole           | 4                     | 0                    | 3                    | 1                    | 0                         | 59                       | 11.9                |
| Paracetamol          | 1                     | 0                    | 1                    | 1                    | 0                         | 26                       | 7.7                 |
| Ramipril             | 0                     | 1                    | 0                    | 1                    | 0                         | 23                       | 8.7                 |
| Salbutamol           | 1                     | 0                    | 0                    | 0                    | 0                         | 12                       | 8.3                 |
| Simvastatin          | 2                     | 0                    | 4                    | 0                    | 0                         | 93                       | 5.4                 |

**Supplementary Table 7. Stratification by archetype analysis from Wesolowska-Andersen and Brorsson et al.** We investigated whether the significant drug-omics associations could be stratified by T2D subtype as inferred by archetype (cluster) analysis performed in Wesolowska-Andersen and Brorsson et al. The four archetypes A-D were defined as, Archetype A (n = 103): low BMI, older age, high insulin sensitivity and high cholesterol; Archetype B (n = 22): obese, insulin sensitive, favorable lipid profiles and low fasting creatinine levels; Archetype C (n = 84) obese, insulin resistance, dyslipidemia; Archetype D (n = 45) obesity, insulin resistance, dyslipidemia, low glucose control, low glucose sensitivity; Mix (n = 472): individuals not associated with any of the archetypes (in between). Between 0-28.6% of the significant hits could be associated to a specific subtype, although the 28.6% were from codeine with only 7 total hits. A median of 6.5% of the hits could be assigned to a specific disease subtype.

| Curated drug name    | N total | N missing start date | Median years | Quantile 2.5 | Quantile 97.5 |
|----------------------|---------|----------------------|--------------|--------------|---------------|
| Acetylsalicylic Acid | 129     | 3                    | 5.9          | 0.5          | 22            |
| Amlodipine           | 105     | 6                    | 3.2          | 0.2          | 25.7          |
| Atenolol             | 59      | 1                    | 11.5         | 1.2          | 28.6          |
| Atorvastatin         | 146     | 2                    | 1.7          | 0.1          | 18.2          |
| Bendroflumethiazide  | 82      | 6                    | 5.2          | 0.5          | 25.2          |
| Bisoprolol           | 82      | 1                    | 3            | 0.2          | 15.9          |
| Codeine              | 46      | 4                    | 3.2          | 0.2          | 22.5          |
| Enalapril            | 47      | 0                    | 4.8          | 0.7          | 21.2          |
| Hydrochlorothiazide  | 87      | 0                    | 5            | 0.7          | 22.8          |
| Lansoprazole         | 57      | 4                    | 4.1          | 0.1          | 16.6          |
| Levothyroxine Sodium | 76      | 2                    | 8.2          | 0.8          | 34.4          |
| Lisinopril           | 46      | 4                    | 3.2          | 0.2          | 22.5          |
| Losartan             | 58      | 6                    | 3.8          | 0.1          | 16.9          |
| Metformin            | 277     | 6                    | 1.1          | 0.2          | 2.1           |
| Metoprolol           | 57      | 4                    | 4.9          | 1            | 19.9          |
| Omeprazole           | 125     | 5                    | 5.1          | 0.3          | 20.9          |
| Paracetamol          | 90      | 9                    | 3.4          | 0.2          | 24.1          |
| Ramipril             | 96      | 0                    | 3.2          | 0.3          | 16.7          |
| Salbutamol           | 45      | 2                    | 5.2          | 0.4          | 46.3          |
| Simvastatin          | 323     | 9                    | 1.9          | 0.1          | 13.6          |

**Supplementary Table 8. Overview of medication usage for the cohort.** Number of individuals taking a drug and the length distribution in years that they have been administered the drug in years (2.5% quantile, median, 97.5% quantile) when the measurements (cohort baseline) were taken. The individuals with ‘N missing start date’ were not included in the calculation of the length of duration.

| Dataset 1               | Dataset 2               | Mean Difference | P-adj      | Lower      | Upper      |
|-------------------------|-------------------------|-----------------|------------|------------|------------|
| Diet and wearables      | Clinical continuous     | -0.00136878     | 1.98E-05   | -0.0021664 | -0.0005711 |
| Metagenomics            | Clinical continuous     | -0.00402892     | 0          | -0.0048266 | -0.0032313 |
| Metagenomics            | Diet and wearables      | -0.00266015     | 0          | -0.0034578 | -0.0018625 |
| Metagenomics            | Proteomics              | -0.00201559     | 1.20E-10   | -0.0028133 | -0.0012179 |
| Metagenomics            | Targeted metabolomics   | -0.00247546     | 0          | -0.0032731 | -0.0016778 |
| Metagenomics            | Transcriptomics         | 1.14E-05        | 1          | -0.0007862 | 0.00080911 |
| Metagenomics            | Untargeted metabolomics | -0.003326       | 0          | -0.0041237 | -0.0025283 |
| Proteomics              | Clinical continuous     | -0.00201333     | 1.25E-10   | -0.002811  | -0.0012157 |
| Proteomics              | Diet and wearables      | -0.00064455     | 0.19884057 | -0.0014422 | 0.00015312 |
| Targeted metabolomics   | Clinical continuous     | -0.00155346     | 8.24E-07   | -0.0023511 | -0.0007558 |
| Targeted metabolomics   | Diet and wearables      | -0.00018468     | 0.99278834 | -0.0009824 | 0.00061299 |
| Targeted metabolomics   | Proteomics              | 0.000459869     | 0.59991517 | -0.0003378 | 0.00125754 |
| Transcriptomics         | Clinical continuous     | -0.00404037     | 0          | -0.004838  | -0.0032427 |
| Transcriptomics         | Diet and wearables      | -0.00267159     | 0          | -0.0034693 | -0.0018739 |
| Transcriptomics         | Proteomics              | -0.00202704     | 9.49E-11   | -0.0028247 | -0.0012294 |
| Transcriptomics         | Targeted metabolomics   | -0.00248691     | 0          | -0.0032846 | -0.0016892 |
| Transcriptomics         | Untargeted metabolomics | -0.00333744     | 0          | -0.0041351 | -0.0025398 |
| Untargeted metabolomics | Clinical continuous     | -0.00070293     | 0.12297685 | -0.0015006 | 9.47E-05   |
| Untargeted metabolomics | Diet and wearables      | 0.000665852     | 0.16801066 | -0.0001318 | 0.00146352 |
| Untargeted metabolomics | Proteomics              | 0.001310403     | 5.13E-05   | 0.00051273 | 0.00210807 |
| Untargeted metabolomics | Targeted metabolomics   | 0.000850534     | 0.02850969 | 5.29E-05   | 0.0016482  |

**Supplementary Table 9. Average drug effect sizes between omics datasets.** We used two-sided ANOVA and Tukey Honest Significant Difference (HSD) tests to identify significant differences of the average drug effects between the omics datasets. P-adj indicates p-value after adjustment for multiple comparisons at 0.95 confidence level. Lower and Upper indicates the lower and upper end points of the intervals in the difference between the means of Dataset 1 and Dataset 2.

| <b>Dataset</b>          | <b>PCC<br/>(difference)</b> | <b>PCC<br/>(cosine)</b> |
|-------------------------|-----------------------------|-------------------------|
| Clinical continuous     | -0.14                       | 0.02                    |
| Diet and wearables      | 0.18                        | 0.01                    |
| Proteomics              | -0.02                       | 0.01                    |
| Targeted metabolomics   | -0.15                       | 0.00                    |
| Untargeted metabolomics | 0.09                        | 0.03                    |
| Transcriptomics         | 0.16                        | -0.04                   |
| Metagenomics            | 0.00                        | 0.00                    |

**Supplementary Table 10. Uncertainty of modalities does not influence inferred effect sizes.** The difference between observations (residualized data input) and reconstructions (output from the VAE) can be seen as a measure of uncertainty in the modalities, and we therefore investigated if this would influence the effect sizes inferred by MOVE. We therefore compared, using Pearson Correlation Coefficient (PCC), the absolute differences between observations and reconstructions (“difference”) to the inferred effect sizes of the drugs. Similarly, we compared the cosine distances between input and reconstructions (“cosine”, similar to Supplementary Figure 5) and the inferred effect sizes of the drugs. Only small correlations were found indicating that uncertainties in the modalities are not driving the inferred effect sizes.

| Source                | No. of drugs | No. of DDIs | Link                                                                                                                                                                                                    |
|-----------------------|--------------|-------------|---------------------------------------------------------------------------------------------------------------------------------------------------------------------------------------------------------|
| Drugbank              | 3,779        | 2,255,390   | <a href="https://go.drugbank.com/releases/latest">https://go.drugbank.com/releases/latest</a>                                                                                                           |
| Twosides              | 1,951        | 351,647     | <a href="https://tatonettlab.org/offsides/">https://tatonettlab.org/offsides/</a>                                                                                                                       |
| TRANSFORMER           | 1,050        | 323,911     | <a href="https://bioinformatics.charite.de/transformer">https://bioinformatics.charite.de/transformer</a>                                                                                               |
| KEGG                  | 2,963        | 206,875     | <a href="https://www.genome.jp/kegg/drug/">https://www.genome.jp/kegg/drug/</a>                                                                                                                         |
| Interaksjoner         | 3,364        | 194,933     | <a href="https://legemiddelverket.no/andre-temaer/fest">https://legemiddelverket.no/andre-temaer/fest</a>                                                                                               |
| SemMedDB              | 2,455        | 83,458      | <a href="https://lhncbc.nlm.nih.gov/ii/tools/SemRep_SemMedDB_SKR.html">https://lhncbc.nlm.nih.gov/ii/tools/SemRep_SemMedDB_SKR.html</a>                                                                 |
| HIV                   | 1,339        | 34,634      | <a href="https://www.hiv-druginteractions.org/">https://www.hiv-druginteractions.org/</a>                                                                                                               |
| CANCER                | 1,021        | 30,256      | <a href="https://cancer-druginteractions.org/">https://cancer-druginteractions.org/</a>                                                                                                                 |
| ONC NI                | 509          | 21,705      | <a href="https://github.com/dbmi-pitt/public-PDDI-analysis">https://github.com/dbmi-pitt/public-PDDI-analysis</a>                                                                                       |
| Interaktion Databasen | 932          | 18,691      | <a href="https://laegemiddelstyrelsen.dk/da/bivirkninger/interaktionsdatabasen-og-medicinkombination/">https://laegemiddelstyrelsen.dk/da/bivirkninger/interaktionsdatabasen-og-medicinkombination/</a> |
| Flockchart            | 289          | 18,400      | <a href="https://drug-interactions.medicine.iu.edu/MainTable.aspx">https://drug-interactions.medicine.iu.edu/MainTable.aspx</a>                                                                         |
| HEP                   | 1,339        | 17,970      | <a href="https://www.hep-druginteractions.org/">https://www.hep-druginteractions.org/</a>                                                                                                               |
| NDF-RT                | 1,144        | 12,199      | <a href="https://evs.nci.nih.gov/ftp1/NDF-RT/">https://evs.nci.nih.gov/ftp1/NDF-RT/</a>                                                                                                                 |
| DDI Corpus 2013       | 1,307        | 10,857      | <a href="https://github.com/isegura/DDICorpus">https://github.com/isegura/DDICorpus</a>                                                                                                                 |
| DDI Corpus 2011       | 846          | 4,664       | <a href="https://github.com/isegura/DDICorpus">https://github.com/isegura/DDICorpus</a>                                                                                                                 |
| OSCAR                 | 158          | 3,378       | <a href="https://sourceforge.net/projects/oscarcmcmaster/">https://sourceforge.net/projects/oscarcmcmaster/</a>                                                                                         |
| CIMA                  | 448          | 3,250       | <a href="https://cima.aemps.es/cima/publico/nomenclator.html">https://cima.aemps.es/cima/publico/nomenclator.html</a>                                                                                   |
| PK Corpus             | 451          | 3,211       | <a href="https://github.com/dbmi-pitt/public-PDDI-analysis">https://github.com/dbmi-pitt/public-PDDI-analysis</a>                                                                                       |
| ONC HIGH              | 195          | 2,865       | <a href="https://github.com/dbmi-pitt/public-PDDI-analysis">https://github.com/dbmi-pitt/public-PDDI-analysis</a>                                                                                       |
| NLM CV Corpus         | 458          | 2,861       | <a href="https://github.com/dbmi-pitt/public-PDDI-analysis">https://github.com/dbmi-pitt/public-PDDI-analysis</a>                                                                                       |
| UHN                   | 103          | 1,855       | <a href="https://hivclinic.ca/drug-information/drug-interaction-tables/">https://hivclinic.ca/drug-information/drug-interaction-tables/</a>                                                             |
| Crediblemeds          | 163          | 403         | <a href="https://www.crediblemeds.org/index.php/healthcare-providers/common-drug-interactions">https://www.crediblemeds.org/index.php/healthcare-providers/common-drug-interactions</a>                 |
| PHAEDRA Corpus        | 126          | 219         | <a href="http://www.nactem.ac.uk/PHAEDRA/index.php">http://www.nactem.ac.uk/PHAEDRA/index.php</a>                                                                                                       |
| HIV-insite            | 108          | 209         | <a href="https://hivinsite.ucsf.edu/">https://hivinsite.ucsf.edu/</a>                                                                                                                                   |
| DDINCBI               | 177          | 201         | <a href="https://sourceforge.net/projects/bioc/files/">https://sourceforge.net/projects/bioc/files/</a>                                                                                                 |

**Supplementary Table 11. Overview of drug-drug interaction databases used. DDI: Drug-drug Interaction.**
